# Supplementary material for: Risk of transition from occasional neck/back pain to long-duration activity limiting neck/back pain: a cohort study on the influence of poor work ability and sleep disturbances in the working population in Stockholm County
Source: PubMed Central journal article supplement — BMJ Open. 2020 Jun 3;10(6):e033946. doi: 10.1136/bmjopen-2019-033946 (PMC7282292; doi:10.1136/bmjopen-2019-033946), 2020-06-03
Supplement: bmjopen-2019-033946.draft_revisions.pdf [file bmjopen-2019-033946.draft_revisions.pdf]

# BMJ Open

BMJ Open is committed to open peer review. As part of this commitment we make the peer review history of every article we publish publicly available.

When an article is published we post the peer reviewers' comments and the authors' responses online. We also post the versions of the paper that were used during peer review. These are the versions that the peer review comments apply to.

The versions of the paper that follow are the versions that were submitted during the peer review process. They are not the versions of record or the final published versions. They should not be cited or distributed as the published version of this manuscript.

BMJ Open is an open access journal and the full, final, typeset and author-corrected version of record of the manuscript is available on our site with no access controls, subscription charges or pay-per-view fees (<http://bmjopen.bmj.com>).

If you have any questions on BMJ Open's open peer review process please email [info.bmjopen@bmj.com](mailto:info.bmjopen@bmj.com)

# BMJ Open

## **Risk of transition from occasional neck/back pain to long-duration activity limiting neck/ back pain; The influence of poor work ability and sleep disturbances**

|                               |                                                                                                                                                                                                                                                                                                                                                                                                                                                               |
|-------------------------------|---------------------------------------------------------------------------------------------------------------------------------------------------------------------------------------------------------------------------------------------------------------------------------------------------------------------------------------------------------------------------------------------------------------------------------------------------------------|
| Journal:                      | <i>BMJ Open</i>                                                                                                                                                                                                                                                                                                                                                                                                                                               |
| Manuscript ID                 | bmjopen-2019-033946                                                                                                                                                                                                                                                                                                                                                                                                                                           |
| Article Type:                 | Original research                                                                                                                                                                                                                                                                                                                                                                                                                                             |
| Date Submitted by the Author: | 29-Aug-2019                                                                                                                                                                                                                                                                                                                                                                                                                                                   |
| Complete List of Authors:     | Holm, Lena; Karolinska institutet, Institute of Environmental medicine<br>Bohman, Tony; Karolinska Institutet, Institute of Environmental Medicine<br>Lekander, Mats; Stress Research Institute, Stockholm University;<br>Karolinska Institutet, Clinical Neuroscience<br>Magnusson, C; Karolinska Institutet, Department of Public Health Sciences<br>Skillgate, Eva; Karolinska institutet, Institute of Environmental medicine;<br>Sophiahemmet University |
| Keywords:                     | EPIDEMIOLOGY, OCCUPATIONAL & INDUSTRIAL MEDICINE,<br>Musculoskeletal disorders < ORTHOPAEDIC & TRAUMA SURGERY                                                                                                                                                                                                                                                                                                                                                 |
|                               |                                                                                                                                                                                                                                                                                                                                                                                                                                                               |

SCHOLARONE™  
Manuscripts

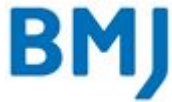

I, the Submitting Author has the right to grant and does grant on behalf of all authors of the Work (as defined in the below author licence), an exclusive licence and/or a non-exclusive licence for contributions from authors who are: i) UK Crown employees; ii) where BMJ has agreed a CC-BY licence shall apply, and/or iii) in accordance with the terms applicable for US Federal Government officers or employees acting as part of their official duties; on a worldwide, perpetual, irrevocable, royalty-free basis to BMJ Publishing Group Ltd ("BMJ") its licensees and where the relevant Journal is co-owned by BMJ to the co-owners of the Journal, to publish the Work in this journal and any other BMJ products and to exploit all rights, as set out in our [licence](#).

The Submitting Author accepts and understands that any supply made under these terms is made by BMJ to the Submitting Author unless you are acting as an employee on behalf of your employer or a postgraduate student of an affiliated institution which is paying any applicable article publishing charge ("APC") for Open Access articles. Where the Submitting Author wishes to make the Work available on an Open Access basis (and intends to pay the relevant APC), the terms of reuse of such Open Access shall be governed by a Creative Commons licence – details of these licences and which [Creative Commons](#) licence will apply to this Work are set out in our licence referred to above.

Other than as permitted in any relevant BMJ Author's Self Archiving Policies, I confirm this Work has not been accepted for publication elsewhere, is not being considered for publication elsewhere and does not duplicate material already published. I confirm all authors consent to publication of this Work and authorise the granting of this licence.

1  
2  
3  
4  
5  
6  
7 Risk of transition from occasional neck/back pain to long-duration activity  
8  
9  
10 limiting neck/ back pain; The influence of poor work ability and sleep  
11  
12  
13 disturbances  
14  
15  
16  
17

18 Corresponding author: Lena W Holm, Institute of Environmental Medicine, Karolinska Institutet, Box  
19 2010, 171 77 STOCKHOLM, Sweden

20  
21 [Lena.Holm@ki.se](mailto:Lena.Holm@ki.se)

22  
23 Phone

24 + 46 704 827479  
25  
26  
27

28 Co-authors in order:

29 Tony Bohman, Institute of Environmental Medicine, Karolinska Institutet, STOCKHOLM, Sweden

30 Mats Lekander. Stress Research Institute, Stockholm University, Sweden  
31

32 Cecilia Magnusson, Department of Clinical Neuroscience, Karolinska Institutet, Stockholm,  
33  
34 Sweden  
35  
36  
37

38 Eva Skillgate Sophiahemmet University, Stockholm, Sweden  
39  
40  
41  
42  
43  
44

45 Word count: 3,158  
46  
47  
48  
49  
50  
51  
52  
53  
54  
55  
56  
57  
58  
59  
60

## ABSTRACT

**Objectives:** The prevalence of neck/back pain (NBP) is high worldwide. Limited number of studies have investigated workers with occasional NBP regarding the risk of developing long-duration activity limiting NBP (LNBP). The objectives were to assess (1) the effect of poor work ability and sleep disturbances in persons with occasional NBP on the risk of LNBP, (2) the interaction effect of these exposures.

**Design:** Prospective cohort study based on three subsamples from the Stockholm Public Health Cohort

**Settings:** The working population in Stockholm County

**Participants:** Persons aged 18–60, and reporting occasional NBP pain the past 6 months at baseline year 2010 (n=16,460).

**Measures:** Work ability was assessed with items from the Work Ability Index, perceived mental and/or physical work ability. Sleep disturbances were self-reported current mild/severe disturbances. The outcome in year 2014 was reporting NBP the previous 6 months, occurring  $\geq$  couple of days per week and resulting in decreased work ability/restricted other daily activities. The additive effect of having both poor work ability and sleep disturbances was modelled with a dummy variable, including both exposures. Poisson log linear regression was used to calculate the risk ratios (RR) and 95% confidence intervals (95%CI).

**Results:** Poor work ability and sleep disturbances were independent risk factors for LNBP; adjusted RR 1.7;(95%CI:1.4-2.0) and 1.4;(95%CI:1.2-1.5) respectively. No additive interaction was observed.

1  
2  
3 **Conclusion:** Workers with occasional NBP who have poor work ability and/or sleep  
4 disturbances are at risk of developing long-duration activity limiting NBP. Having both  
5  
6 conditions does not exceed the additive risk.  
7  
8  
9  
10  
11  
12  
13  
14  
15  
16  
17  
18  
19  
20  
21  
22  
23  
24  
25  
26  
27  
28  
29  
30  
31  
32  
33  
34  
35  
36  
37  
38  
39  
40  
41  
42  
43  
44  
45  
46  
47  
48  
49  
50  
51  
52  
53  
54  
55  
56  
57  
58  
59  
60

For peer review only

## ARTICLE SUMMARY

### Strengths and limitations of this study

- A longitudinal design and the exposures were measured at baseline and the outcome at follow-up four years later, thus the temporality has been taken care of.
- Large study population securing statistical power
- A comprehensive control of confounding factors increases the possibility of causality
- The main possible limitation is the misclassification of the exposures and the outcome and would, if any, result in an underestimation of the results.

## INTRODUCTION

Despite decades of research aiming to understand how to prevent and treat activity limiting or disabling neck and/or back pain (LNBP), these health conditions seem to increase over time and are the leading causes of disability globally[1, 2]. Preventive measures are necessary in order to reduce the burden of disease in society and require a knowledge of modifiable risk factors. A recent systemic review of risk factors for the onset of “first episode” neck pain concludes that personal, as well as work-related factors play a role in the development of neck pain, some of which are modifiable while others are no [3]. Another systematic review concludes that physical activity may reduce the risk of long-duration low back pain, [4] while the evidence of risk factors for recurrence of low back pain,[5] and neck pain,[6] is sparse. Most people experience recurrent occasional short duration NBP, and it is necessary to identify the factors involved in the transition to long-duration and activity limiting pain conditions in order to address these in prevention measures.

Self-perceived work ability is a concept which has been widely studied in occupational settings, often as a predictor of future sickness absence,[7, 8], but it has also been shown to be associated with outcomes such as health-related production loss,[9] and work turnover [10] . A frequently used measurement is the Work Ability Index (WAI) and its subscales. WAI consists of seven items including two about perceived work ability in relation to physical and mental work demands[11]. Ahlstrom et al.,[12] used both the full WAI and the single item WAI-S; “current work ability compared with the lifetime best”, and found that both were associated with sickness absenteeism over a 12 month-period . Lundin et al. found that this single WAI item had an excellent ability to predict long-term sickness absence, and also that the two items covering perceived mental and physical work ability had acceptable predictive ability[13].



1  
2  
3 Little is known about the impact of perceived work ability on the development of NBP. A  
4 recent clinical study of primary care patients with low back pain found an association  
5 between higher work ability measured with the WAI item “current work ability compared  
6 with the lifetime best” and improvement in work ability, pain and quality of life at follow  
7 up[14], but other than this, the topic appears to have escaped scientific investigation despite  
8 the construct’s connection to future ill-health.  
9

10  
11 It is well established that impaired sleep increases the risk of several health problems of  
12 varying severity, for instance all-cause cardiopulmonary mortality, respiratory tract  
13 infections, hypertension as well as depression[15-17] Current evidence suggests that sleep  
14 disturbances are a risk factor for the onset of NBP [18], as well as a prognostic factor in  
15 subacute or long-lasting pain conditions,[19, 20], and for sickness absence[21].  
16

17  
18 Hypothesizing that poor work ability and sleep disturbances are independent risk factors for  
19 the development of long-lasting LNBP, it is possible that having both factors results in a  
20 synergistic effect.  
21  
22

23  
24 Few studies have focused on workers with occasional NBP and their risk of LNBP. We have  
25 previously studied job strain and sleep disturbances,[22, 23] regarding the risk of LNBP and  
26 have found that high job strain (high job demands/low job control) and active jobs (high job  
27 demands/high job control) as well as sleep disturbances were independent risk factors, but  
28 the estimates were modest for both conditions. The results also indicated that sleep  
29 disturbances may modify the association between high job strain and long-duration activity  
30 limiting neck pain, [22], but this was not the case for back pain[23]. In another study, also  
31 based on workers with occasional neck pain, work-related and leisure time physical activity  
32 were assessed for the risk of long-duration activity limiting neck pain, but no associations  
33 were found[24].  
34  
35  
36  
37  
38  
39  
40  
41  
42  
43  
44  
45  
46  
47  
48  
49  
50  
51  
52  
53  
54  
55  
56  
57  
58  
59  
60

1  
2  
3 In summary, there is some evidence that poor perceived work ability and sleep disturbances  
4 contribute both to the onset of and the recovery from pain conditions but little is known about  
5 the transitions from occasional pain to long-duration pain that affects daily activities which  
6 includes the spectra from minor restrictions to full work disability. The primary aim of this  
7 study was, to assess the effect of poor mental and/or poor physical work ability and sleep  
8 disturbances respectively in persons with occasional NBP, for the risk of developing LNBP.  
9  
10 A secondary aim was to assess the additive interaction effect between these two exposures.  
11  
12  
13  
14  
15  
16  
17  
18  
19  
20  
21  
22  
23  
24  
25  
26  
27  
28  
29  
30  
31  
32  
33  
34  
35  
36  
37  
38  
39  
40  
41  
42  
43  
44  
45  
46  
47  
48  
49  
50  
51  
52  
53  
54  
55  
56  
57  
58  
59  
60

## MATERIAL AND METHODS

### Design, source and study population

A prospective cohort was formed based on three subsamples of the Stockholm Public Health Cohort; one recruited in year 2002 and followed up in year 2006, 2010 and 2014, one formed in 2006 and followed up in 2010 and 2014, and a third formed in 2010 and followed up in 2014. We used the 2010 and 2014 waves as baseline and follow-up respectively in all subsamples. The data used (i.e. the questions) were defined in the same way in these subsamples in 2010 and 2014.

Persons aged 18–60 who were participating in any of the three subsamples in 2010 were included if they reported NBP during the past six months up to a couple of days per month but not more often, and were responding to any of two items from the Work Ability Index (WAI); physical and mental capacity in relation to work demands (indicating that the persons were active in working life) at baseline.

Persons with sickness absence of more than 90 days during the past 12 months were excluded.

### Exposures

The exposure self-perceived physical work ability and mental work ability in relation to work demands was measured with two questions from the WAI. The psychometric properties of this instrument have been tested,[25, 26], and it is considered stable at a group level, predictive and internally coherent. Physical work ability was measured with the question: “How do you rate your current work ability with respect to the physical demands of your work?” The answering alternatives were: “Very good”, “Good”, “Rather good”, “Rather poor”, and “Poor”. The variable was dichotomised into poor work ability (“Moderate”, “Rather poor” or “Poor”), and good work ability (“Very good” or “Rather good”). Mental

1  
2  
3 work ability was measured with the question: “How do you rate your current work ability  
4 with respect to the psychological and mental demands of your work?” The alternative  
5 response for mental work ability were the same as for physical work ability and the variable  
6 was dichotomised in the same way. The two items were then merged into “poor work ability”  
7 (“Rather good”, “Rather poor”, “Poor” in one or both of the items), whereas those scoring  
8 “Good” or “Very good” on both items, were categorised as having “Good work ability” (non-  
9 exposed).

10  
11  
12 The exposure sleep disturbances were defined as having responded “Yes mild” or “Yes  
13 severe” to the question “Do you have sleep disturbances?”. Those responding “No” were  
14 classified as unexposed.

### 25 26 27 **Outcome**

28  
29  
30 The outcome LNBP was operationalised by the response from the 2014 questionnaire and  
31 was defined as having reported NBP during the past 6 months, occurring a couple of days per  
32 week or more often, and resulting in a decreased work ability/restricted other daily activities.

### 33 34 35 36 37 **Confounding control**

38  
39  
40 We controlled for several potential confounders, based on relevance and on the literature on  
41 risk factors for disabling NBP (table 1). For the work ability exposure, one model was run,  
42 adding sleep disturbances as a confounder, and similarly for the model sleep disturbances,  
43 one model was run adding work ability as a confounder.  
44  
45  
46  
47  
48  
49  
50  
51  
52  
53  
54  
55  
56  
57  
58  
59  
60

Table 1. Description of the variables, tested as potential confounders

| Variables                       | Operationalisation <sup>1</sup>                                                                                                                                                                                                                                |
|---------------------------------|----------------------------------------------------------------------------------------------------------------------------------------------------------------------------------------------------------------------------------------------------------------|
| Age                             | Continuous and categorised in 5-year intervals                                                                                                                                                                                                                 |
| Sex                             | Man/Woman                                                                                                                                                                                                                                                      |
| Socioeconomic Status (SES)      | Based on occupational class, classified according to the Swedish socioeconomic classification, developed by Statistics Sweden and retrieved from National Register in Sweden: A combination of current occupation and highest educational level (6 categories) |
| Body Mass Index                 | Continuous and categorised into Underweight <18.5, Normal weight 18.5–24.9, Overweight 25–29.9, Obese $\geq 30$                                                                                                                                                |
| Daily Smoking                   | Question: “Are you currently smoking daily or almost daily” Response alternatives: “Yes,” “No”                                                                                                                                                                 |
| Sedentary Leisure Time Activity | “State your average physical activity during the past 12 months”; Leisure time sitting; watching, TV, reading. The response alternatives were added up and categorised into <2 hrs/day, 2-3 hrs/day, and more than 3 hrs/day                                   |
| Physical Activity               | “State your physical activity (PA) during the past 12 months” categorised into Walking/cycling less than 20 min/day AND other leisure time PA less than 1 hr/week vs PA (walking/biking, other PA) exceeding these time durations                              |

---

|                        |                                                                                                                                                                                       |
|------------------------|---------------------------------------------------------------------------------------------------------------------------------------------------------------------------------------|
| Household Composition  | Three categories; adult living alone, adult living with other adult(s) with/ without children, adult living with children                                                             |
| Psychological Distress | Derived from the General Health Questionnaire (GHQ12) [27, 28] and categorized into < 3, 3–7 and > 7.                                                                                 |
| Long-standing illness  | The question “Do you have any long-duration sickness, health problems as a result of an accident, handicap or other long-duration health problem?” Response alternatives: “Yes “,”No” |

---

<sup>1</sup> All variables were retrieved from the baseline questionnaire except Socioeconomic Status, which is retrieved from National Swedish Registers

## Statistical Methods

Generalized Linear models with Poisson log linear regression was used to estimate the association between the exposures and the outcome. The results are presented as a risk ratio (RR) with 95% confidence intervals (CI). We ran four adjusted models. For work ability, the first model excluding and the second including sleep disturbances, and for sleep disturbances, one model excluding and the second including work ability. This was done since it might be argued that these factors act as mediators rather than confounders.

To assess whether the interaction between the two risk factors; poor work ability and sleep disturbances deviated from additivity regarding the risk of developing LNBP, we created a dummy variable: having poor work ability/no sleep disturbances, no poor work ability/ sleep disturbances, both poor work ability and sleep disturbances[29]. Having none of the conditions served as a reference, and this model was run in a Poisson log linear regression.

Factors potentially confounding the effect between the exposures and the outcome were added, one at the time, to each univariate model. If the crude estimate changed by 5% or more, the factor was considered a confounder and was included in the adjusted model. We also added a variable including the origin of the three subsamples, since, for two of the merged subsamples, the first and second follow-up wave respectively were used as baseline in our study.

To assess the potential selection bias, attrition analysis was conducted by comparing the prevalence of the main exposure, work ability, among those lost to follow-up and those with missing data on any of the outcome variables, with the prevalence of this exposure among those successfully followed.

IBM® SPSS Statistics version 25 was used.

### **Patient and Public Involvement**

Patients or the public were not involved in the design or planning of the study.

For peer review only



## RESULTS

The total study population was 16,460. Of those 11,276 were successfully followed up and 11,229 responded to the back/neck pain questions, which gives a follow-up rate of 68%, (figure 1).

Of the 16,460 participants, 1,989 (12%) reported poor work ability and 1,392 (8%) reported mild or severe sleep disturbances at baseline. A detailed description of the study population is displayed in table 2, and stratified into those with poor versus good work ability. Age and sex were relatively evenly distributed across the two groups. The most common occupations represented were intermediate non-manual workers and employed/self-employed professionals/higher civil servants/executives.

Table 2. Baseline characteristics of the study population in relation to work ability

(n=16,460)

| Characteristic                                           | Good work ability |       | Poor <sup>1</sup> work ability |       |
|----------------------------------------------------------|-------------------|-------|--------------------------------|-------|
|                                                          | n: 14,471 (88%)   |       | n: 1,989 (12%)                 |       |
|                                                          | n                 | %     | n                              | %     |
| Female                                                   | 8,279             | 57    | 1,252                          | 63    |
| Age Mean (SD)                                            | 43.2              | 10.0  | 42.9                           | 10.5  |
| Age Median (min-max)                                     | 44                | 18–60 | 44                             | 18–60 |
| Socioeconomic Status                                     |                   |       |                                |       |
| Unskilled/semiskilled workers                            | 1,498             | 11    | 406                            | 22    |
| Skilled workers                                          | 1,401             | 10    | 248                            | 13    |
| Assistant non-manual workers                             | 1,932             | 14    | 244                            | 13    |
| Intermediate non-manual workers                          | 4,164             | 30    | 468                            | 25    |
| Employed/self-employed professionals,                    | 3,501             | 25    | 333                            | 18    |
| Self-employed other than professionals                   | 1,283             | 9     | 169                            | 9     |
| Household composition                                    |                   |       |                                |       |
| Living together with adult (with or<br>without children) | 11,628            | 81    | 1,464                          | 74    |
| Living with children                                     | 805               | 5     | 147                            | 7     |
| Living alone                                             | 1,990             | 14    | 369                            | 19    |
| Body Mass Index, kg/m <sup>2</sup>                       |                   |       |                                |       |
| < 18.5                                                   | 187               | 1     | 39                             | 2     |
| 18.5–24.9                                                | 7,978             | 56    | 1,022                          | 53    |
| 25.0–29.9                                                | 4,628             | 33    | 600                            | 31    |

|                                              |        |        |    |       |    |
|----------------------------------------------|--------|--------|----|-------|----|
|                                              | ≥ 30.0 | 1,446  | 10 | 281   | 15 |
| Daily Smoking                                |        | 1,424  | 10 | 320   | 16 |
| Physical Activity <sup>2</sup>               |        |        |    |       |    |
| None or low (less than 1 hr/w)               |        | 1,989  | 14 | 445   | 23 |
| Intermediate                                 |        | 8,730  | 60 | 1,149 | 58 |
| High                                         |        | 3,288  | 23 | 336   | 17 |
| Very High (more than 5 hrs /w)               |        | 424    | 3  | 47    | 2  |
| Sedentary leisure time (TV, reading etc.)    |        |        |    |       |    |
| < 2 hrs/day                                  |        | 9,111  | 63 | 1,038 | 53 |
| 2–3 hrs/day                                  |        | 3,740  | 26 | 578   | 29 |
| More than 3 hrs/day                          |        | 1,558  | 11 | 360   | 18 |
| Sleep disturbances                           |        |        |    |       |    |
| No                                           |        | 10,478 | 73 | 914   | 47 |
| Yes, mild                                    |        | 355    | 25 | 866   | 44 |
| Yes, severe                                  |        | 237    | 2  | 169   | 9  |
| Psychological Distress (GHQ12 <sup>3</sup> ) |        |        |    |       |    |
| No (0-2)                                     |        | 12,250 | 85 | 1,005 | 51 |
| Mild (3-6)                                   |        | 1,590  | 11 | 485   | 25 |
| Severe (7-12)                                |        | 602    | 4  | 493   | 25 |
| Long-standing illness                        |        | 8,200  | 22 | 3,837 | 54 |

<sup>1</sup> WAI (Work Ability Index) items[11], self-perceived physical and/or mental work ability in relation to job demands and defined as moderate, rather poor, poor. <sup>2</sup> Defined as a combination of cycling/walking and other physical activity expressed as hours per week

1  
2  
3 <sup>3</sup> GHQ12 General Health Questionnaire – 12 items[27]. Total numbers across rows differ due  
4  
5 to internal missing values  
6  
7  
8  
9  
10  
11  
12  
13  
14  
15  
16  
17  
18  
19  
20  
21  
22  
23  
24  
25  
26  
27  
28  
29  
30  
31  
32  
33  
34  
35  
36  
37  
38  
39  
40  
41  
42  
43  
44  
45  
46  
47  
48  
49  
50  
51  
52  
53  
54  
55  
56  
57  
58  
59  
60

For peer review only

1  
2  
3  
4  
5  
6 In 2014, 1,056 (9%) of the 11,229 responders had developed LNBP. Those successfully  
7 followed-up were compared with those who dropped out/had missing information on the  
8 outcome (n=5,231), with respect to the main exposure work ability. Fifteen percent of the  
9 drop-outs had poor work ability compared to 11% among those successfully followed-up.  
10  
11  
12  
13  
14  
15

16 The results of the Poisson log linear regression analyses are presented in tables 3 and 4. Of  
17 those with poor work ability, 214 (18%) participants developed LNBP. The confounders in  
18 this association were socioeconomic status (SES) and long-standing illness and were  
19 therefore adjusted for, yielding an RR of 1.8 (95% CI;1.6–2.2). Adding sleep disturbances to  
20 the model yields an RR of 1.7 (95% CI; 1.4–2.0) (table 3 a).  
21  
22  
23  
24  
25  
26  
27

28 Of those with sleep disturbances, 411 (13%) developed LNBP. Socioeconomic status (SES)  
29 and long-standing illness were confounders also in the association between sleep disturbances  
30 and the outcome (adjusted RR 1.5 (95%CI; 1.3–1.7)). Adding poor work ability to the model  
31 yields an RR of 1.4 (95%CI:1.2–1.6) (table 3b).  
32  
33  
34  
35  
36  
37  
38  
39  
40  
41  
42  
43  
44  
45  
46  
47  
48  
49  
50  
51  
52  
53  
54  
55  
56  
57  
58  
59  
60

Table 3. Association between poor work ability<sup>1</sup> (a) and sleep disturbances<sup>2</sup> (b) and long-duration troublesome neck -and/or back pain. Risk Ratio (RR) and 95% Confidence Interval (95%CI)

| (a)                             | Cases/ All | Crude RR | 95 % CI   | Model 1 <sup>3</sup> Adjusted RR | 95% CI    | Model 2 <sup>4</sup> Adjusted RR | 95% CI    |
|---------------------------------|------------|----------|-----------|----------------------------------|-----------|----------------------------------|-----------|
| Good work ability               | 842/10,011 | ref      |           | ref                              |           | ref                              |           |
| Poor work ability <sup>1</sup>  | 214/1,218  | 2.1      | (1.8-2.4) | 1.8                              | (1.6-2.1) | 1.7                              | (1.4-2.0) |
| (b)                             | Cases/ All | Crude RR | 95 % CI   | Model 1 <sup>3</sup> Adjusted RR | 95% CI    | Model 2 <sup>5</sup> Adjusted RR | 95% CI    |
| Good sleep                      | 625/7,833  | ref      |           | ref                              |           | ref                              |           |
| Sleep disturbances <sup>2</sup> | 411 /3,257 | 1.6      | (1.4-1.8) | 1.5                              | (1.3-1.7) | 1.4                              | (1.2-1.5) |

<sup>1</sup> WAI (Work Ability Index) items, self-perceived physical and/or mental work ability in relation to job demands and defined as moderate, rather poor, poor. <sup>2</sup> Sleep disturbances = current mild or severe sleep disturbances. <sup>3</sup> Adjusted for socioeconomic status, chronic comorbidity and subsample (year 2002, 2006, 2010). <sup>4</sup> Adjusted for socioeconomic status, chronic comorbidity, sleep disturbances and subsample (year 2002, 2006, 2010). <sup>5</sup> Adjusted for socioeconomic status, chronic comorbidity, work ability and subsample (year 2002, 2006, 2010)

1  
2  
3  
4  
5 The analysis including the interaction variable, poor work ability and sleep disturbances,  
6  
7 showed after adjusting for SES and chronic comorbidity that those solely with poor WAI had  
8  
9 a doubly increased risk of developing LNBP (RR 2.1 (95% CI; 1.7–2.6) compared to those  
10  
11 with none of the risk factors. Having sleep disturbances solely yields an RR 1.5 (95% CI;  
12  
13 1.3–1.7), and having both conditions was similar to having poor WAI only (RR 2.1  
14  
15 (95%CI;1.7–2.6) (table 4).  
16  
17  
18  
19  
20  
21  
22  
23  
24  
25  
26  
27  
28  
29  
30  
31  
32  
33  
34  
35  
36  
37  
38  
39  
40  
41  
42  
43  
44  
45  
46  
47  
48  
49  
50  
51  
52  
53  
54  
55  
56  
57  
58  
59  
60

Table 4. Association between different combinations of poor work ability<sup>1</sup> and sleep disturbances<sup>2</sup>, and long-duration troublesome neck -and/or back pain.

Risk Ratio (RR) and 95% Confidence Interval (95%CI)

|                                           | Cases/ All | Crude RR | 95 % CI   | Adjusted <sup>3</sup> RR | 95% CI    |
|-------------------------------------------|------------|----------|-----------|--------------------------|-----------|
| Good work ability/ No sleep disturbances  | 534/7,281  | ref      |           | ref                      |           |
| Poor work ability / No sleep disturbances | 91/552     | 2.4      | (2.0-3.0) | 2.1                      | (1.7-2.6) |
| Good work ability /Sleep disturbances     | 294/2,610  | 1.5      | (1.3-1.8) | 1.5                      | (1.3-1.7) |
| Poor work ability /Sleep disturbances     | 117/647    | 2.4      | (1.9-2.9) | 2.1                      | (1.6-2.6) |

<sup>1</sup> Assessed with WAI (Work Ability Index) items, self-perceived physical and/or mental work ability in relation to job demands and defined as moderate, rather poor, poor. <sup>2</sup> Sleep disturbances = current mild or severe sleep disturbances. <sup>3</sup> Adjusted for socioeconomic status, long-standing illness and subsample (year 2002, 2006, 2010)



## DISCUSSION

The results of this study suggest that persons with occasional NBP who assess their work ability (mental and/or physical) as poor, in relation to the work demands have a higher risk of developing LNBP. Also those who reported sleep disturbances had a higher risk of such an outcome. The risk in persons with both poor work ability and sleep disturbances was not more than additive.

When it comes to research about work ability and NBP, we only found one earlier study, namely on primary care patients with various durations of low back pain. In that prognostic study, they used another item from the WAI when predicting decrease in disability[14], thus it is not comparable to our risk study.

The majority of published studies using items from the WAI, when measuring work ability and its impact on health, have sickness absence as the outcome[7, 8, 30, 31]. In the present study, 33% of the cases reported all-cause sickness absence longer than 7 days during the 12 months preceding the follow-up (8–30 days: 18%, and longer than 30 days: 15%). Among the non-cases the corresponding figures were 14% (11% and 4% respectively). In all, we note that only 1/3 of the cases had a history of sickness absence in the year prior to the follow up, thus our study adds new knowledge to this topic, since the outcome in our study is not equal or similar to sickness absenteeism or disability pension investigated in previous studies.

Perceived physical and/or mental work ability in relation to work demands are theoretically modifiable factors, although they are not always easy to change without changing job or employer. Poor work ability has been shown to be associated with high work turnover[10], thus job change may be an option in order to prevent long-duration activity limiting pain conditions. Another option might be that the employee in dialogue with their employer investigates the possibilities of changes within the current job, or that the individual takes

1  
2  
3 their own responsibility for physical and mental health maintenances through self-care such  
4  
5 as leisure time physical activity or similar actions.  
6  
7

8  
9 Several studies have shown that sleep disturbance or daytime sleepiness are risk factors for  
10  
11 the onset of NBP as well as a factor that impedes recovery[32-34], and are also a risk factor  
12  
13 for the onset of musculoskeletal pain in general[35, 36]. One likely mechanism behind the  
14  
15 association between sleep disturbances and pain is elevated levels of inflammatory markers  
16  
17 triggering the onset of, and continuation of pain[37]. We have, however not found any  
18  
19 previous studies based on a population with occasional NBP. Sleep disturbance is a  
20  
21 modifiable factor, and cognitive behaviour therapy is a recommended treatment for insomnia,  
22  
23 the most common sleep disturbance[38]. There is also some evidence that cognitive therapy  
24  
25 for insomnia may improve other health problems such as depression and anxiety; thus,  
26  
27 treating sleep problems may also improve comorbid conditions that in turn are often related  
28  
29 to pain [39]. It is, therefore, possible that treating sleep problems in persons with occasional  
30  
31 NBP may reduce the risk of activity limiting pain, but this needs to be evaluated in future  
32  
33 studies.  
34  
35  
36  
37  
38

### 39 **Strengths**

40  
41  
42 This is a population-based longitudinal study covering residents in the largest county in  
43  
44 Sweden with a large sample size allowing interaction analysis. Another strength is the  
45  
46 thorough control for possible confounding factors in the analyses. Furthermore,  
47  
48 although almost 1/3 of the study participants had dropped out at the follow up in 2014, the  
49  
50 prevalence of the main exposure was 11% and 15% of these successfully followed versus the  
51  
52 drop-outs. We believe that selection bias has a minor impact on the results, although this  
53  
54 cannot be fully ruled out. If the exposed participants who dropped out were less likely to have  
55  
56 the outcome compared to the exposed participants who were successfully followed, we may  
57  
58  
59  
60

1  
2  
3 have overestimated the true effect. We excluded those who in 2010 reported that they had a  
4 sickness absence of more than 90 days during the 12 months preceding entry to the study.

5  
6  
7 The reason for this was to avoid the issue of major morbidity influencing the participants'  
8 judgment of their work ability for illness not related to NBP, and thus also reducing the risk  
9  
10 of null-findings when there would be a true risk.  
11  
12  
13

### 14 15 **Limitations**

16  
17  
18 The main limitations are possible misclassification due to imprecise or time-varying  
19 exposure, resulting in a non-differential exposure misclassification which, if any, will have  
20 led to a dilution of the effect estimate. In particular, we believe that the way sleep  
21 disturbances were measured may be prone to misclassification. One single question with  
22 three response alternatives may not fully capture the concept of sleep disturbances.  
23  
24  
25

26  
27  
28 Also, work ability may be prone to non-differential misclassification, since we did not have  
29 access to the full WAI. However, these single questions on perceived work ability in relation  
30 to job demands have previously been validated, both against the full WAI[13] and when used  
31 as predictors for sickness absences with acceptable results[12]. Nevertheless, if anything,  
32 such misclassification bias would lead to diluted associations. Furthermore, the exposure  
33 work ability may change over the follow-up period, most likely due to a job change. Exactly  
34 the same proportion among cases and non-cases had changed job/new employer in 2014  
35 compared to 2010, (28%), which to some extent reduces the likelihood of differential  
36 misclassification of work ability.  
37  
38  
39  
40  
41  
42  
43  
44  
45  
46  
47  
48  
49

50  
51 We claim that the results of our study is generalizable to other settings on persons active in  
52 working life. Even though the study showed that the absolute risk of LNBP is modest, with  
53 less than 10% of those with occasional NBP developing the more severe condition according  
54  
55  
56  
57  
58  
59  
60

1  
2  
3 to our definition, it is a major and expensive public health problem that accumulates over  
4  
5 time.  
6  
7

8 This study adds knowledge to the area of why persons with occasional NBP develop long-  
9  
10 duration and activity limiting NBP. Paying attention to persons with occasional NBP who  
11  
12 have poor perceived work ability and/or sleep disturbances, and taking action accordingly,  
13  
14 may reduce this burden of ill-health. We welcome future research on the effect of  
15  
16 occupational preventive measures for workers with poor work ability.  
17  
18

## 19 20 **ACKNOWLEDGEMENTS**

21  
22 We thank Peeter Fredlund, Research Statistician at Karolinska Institutet and SLL Centre for  
23  
24 Epidemiology and Community Medicine, Stockholm, for providing us with the data and for  
25  
26 the prompt answers to our questions about the variables.  
27  
28  
29

## 30 31 **AUTHOR CONTRIBUTIONS**

32  
33 LWH, TB, ML and ES contributed to the conceptualisation and methodology of the study  
34  
35 which was approved by CM. CM provided the data resources. LWH made the statistical  
36  
37 analyses based on a protocol approved by the co-authors. LWH wrote a draft of the  
38  
39 manuscript. All authors contributed to the interpretation of the results and critically revised  
40  
41 the manuscript and finally approved the last version.  
42  
43  
44  
45

## 46 47 **FUNDING**

48  
49 The study was funded by AFA- Insurance Grant No 170095. The funder had no involvement  
50  
51 in any of the steps of the manuscript preparation.  
52  
53  
54

## 55 56 **COMPETING INTERESTS**

1  
2  
3 Dr:s Eva Skillgate and Lena Holm are scientific consultants at the Scandinavian College of  
4 Naprapathic Manual Medicine and members of their Scientific Board.  
5  
6

### 7 8 **ETHICS APPROVAL** 9

10  
11 Ethical approval was obtained from the regional ethical review board in Stockholm (Dnr;  
12 2007/545-31, 2013/497-32 and 2015/1204-32). The questionnaires included information  
13  
14 about handling of personal data, and the participants accepted the use of their data by  
15  
16 answering to the questionnaires (written informed consent).  
17  
18  
19

### 20 21 **DATA SHARING STATEMENT** 22

23  
24 Due to ethical restrictions and laws (GDPR) of disclosing personal data, authors have to seek  
25  
26 permission to allow us to make the data used in this study available. Data will be available  
27  
28 upon request after permission is granted from the Karolinska Institutet's Ethics Review Board  
29  
30 in Stockholm. Inquiries for data access should first be sent to [eva.skillgate@ki.se](mailto:eva.skillgate@ki.se), who will  
31  
32 then contact the ethics board for permission to openly share the data.  
33  
34  
35  
36  
37  
38  
39  
40  
41  
42  
43  
44  
45  
46  
47  
48  
49  
50  
51  
52  
53  
54  
55  
56  
57  
58  
59  
60

## REFERENCES

1. Hoy D, Bain C, Williams G, et al. A systematic review of the global prevalence of low back pain. *Arthritis Rheum.* 2012;64(6):2028-37. Epub 2012/01/11. doi: 10.1002/art.34347.
2. Hoy D, March L, Woolf A, et al. The global burden of neck pain: estimates from the global burden of disease 2010 study. *Ann Rheum Dis.* 2014;73(7):1309-15. doi: 10.1136/annrheumdis-2013-204431.
3. Kim R, Wiest C, Clark K, Cook C, et al. Identifying risk factors for first-episode neck pain: A systematic review. *Musculoskelet Sci Pract.* 2018;33:77-83. doi: 10.1016/j.msksp.2017.11.007.
4. Shiri R, Falah-Hassani K. Does leisure time physical activity protect against low back pain? Systematic review and meta-analysis of 36 prospective cohort studies. *Br J Sports Med.* 2017;51(19):1410-8. doi: 10.1136/bjsports-2016-097352.
5. da Silva T, Mills K, Brown BT, et al. Risk of Recurrence of Low Back Pain: A Systematic Review. *J Orthop Sports Phys Ther.* 2017;47(5):305-13. doi: 10.2519/jospt.2017.7415.
6. Langenfeld A, Humphreys BK, Swanenburg J, et al. Prognostic factors for recurrences in neck pain patients up to 1 year after chiropractic care. *J Manipulative Physiol Ther.* 2015;38(7):458-64. doi: 10.1016/j.jmpt.2015.06.014.
7. Alavinia SM, de Boer AG, van Duivenbooden JC, et al. Determinants of work ability and its predictive value for disability. *Occup Med (Lond).* 2009;59(1):32-7. Epub 2008/12/17. doi: 10.1093/occmed/kqn148 kqn148[pii].
8. Kinnunen U, Natti J. Work ability score and future work ability as predictors of register-based disability pension and long-term sickness absence: A three-year follow-up study. *Scand J Public Health.* 2018;46(3):321-30. doi: 10.1177/1403494817745190.
9. Lohela Karlsson M, Busch H, Aboagye E, Jensen I. Validation of a measure of health-related production loss: construct validity and responsiveness - a cohort study. *BMC Public Health.* 2015;15:1148. Epub 2015/11/21. doi: 10.1186/s12889-015-2449-z 10.1186/s12889-015-2449-z [pii].

- 1  
2  
3 10. Rongen A, Robroek SJ, van der Heijden BI, et al. Influence of work-related characteristics and  
4 work ability on changing employer or leaving the profession among nursing staff. *J Nurs Manag.*  
5 2014;22(8):1065-75. Epub 2013/08/15. doi: 10.1111/jonm.12066.  
6  
7  
8  
9 11. Tuomi K, Ilmarinen J, Jahkola A, et al. Work ability index. Helsinki: Finnish Institute of  
10 Occupational Health, 1998.  
11  
12  
13 12. Ahlstrom L, Grimby-Ekman A, Hagberg M, et al. The work ability index and single-item  
14 question: associations with sick leave, symptoms, and health--a prospective study of women on long-  
15 term sick leave. *Scand J Work Environ Health.* 2010;36(5):404-12. Epub 2010/04/08.  
16  
17  
18 13. Lundin A, Leijon O, Vaez M, et al. Predictive validity of the Work Ability Index and its  
19 individual items in the general population. *Scand J Public Health.* 2017;45(4):350-6. Epub  
20 2017/04/08. doi: 10.1177/1403494817702759.  
21  
22  
23 14. Nordstoga AL, Vasseljen O, Meisingset I, et al. Improvement in Work Ability, Psychological  
24 Distress and Pain Sites in Relation to Low Back Pain Prognosis: A Longitudinal Observational Study  
25 in Primary Care. *Spine (Phila Pa 1976).* 2019;44(7):E423-E9. doi: 10.1097/BRS.0000000000002860.  
26  
27  
28 15. Parthasarathy S, Vasquez MM, Halonen M, et al. Persistent insomnia is associated with mortality  
29 risk. *Am J Med.* 2015;128(3):268-75 e2. doi: 10.1016/j.amjmed.2014.10.015.  
30  
31  
32 16. Nieters A, Blagitko-Dorfs N, Peter HH, et al. Psychophysiological insomnia and respiratory tract  
33 infections: results of an infection-diary-based cohort study. *Sleep.* 2019. doi: 10.1093/sleep/zsz098.  
34  
35  
36 17. Dong Y, Yang FM. Insomnia symptoms predict both future hypertension and depression. *Prev*  
37 *Med.* 2019;123:41-7. doi: 10.1016/j.ypmed.2019.02.001. PubMed PMID: 30742871.  
38  
39  
40 18. Canivet C, Ostergren PO, Choi B, et al. Sleeping problems as a risk factor for subsequent  
41 musculoskeletal pain and the role of job strain: results from a one-year follow-up of the Malmo  
42 Shoulder Neck Study Cohort. *Int J Behav Med.* 2008;15(4):254-62. doi:  
43 10.1080/10705500802365466.  
44  
45  
46 19. Kovacs FM, Seco J, Royuela A, et al. Patients with neck pain are less likely to improve if they  
47 experience poor sleep quality: a prospective study in routine practice. *Clin J Pain.* 2015;31(8):713-21.  
48  
49  
50  
51  
52  
53  
54  
55  
56  
57  
58  
59  
60

- 1  
2  
3 20. Paanalahti K, Wertli MM, Held U, et al. Spinal pain--good sleep matters: a secondary analysis of  
4 a randomized controlled trial. *Eur Spine J*. 2016;25(3):760-5. doi: 10.1007/s00586-015-3987-x.  
5  
6  
7 21. Aili K, Nyman T, Hillert L, et al. Sleep disturbances predict future sickness absence among  
8 individuals with lower back or neck-shoulder pain: a 5-year prospective study. *Scand J Public Health*.  
9 2015;43(3):315-23. doi: 10.1177/1403494814567755.  
10  
11  
12 22. Rasmussen-Barr E, Grooten WJ, Hallqvist J, et al. Are job strain and sleep disturbances prognostic  
13 factors for neck/shoulder/arm pain? A cohort study of a general population of working age in Sweden.  
14 *BMJ Open*. 2014;4(7):e005103. doi: 10.1136/bmjopen-2014-005103.  
15  
16  
17 23. Rasmussen-Barr E, Grooten WJA, Hallqvist J, et al. Are job strain and sleep disturbances  
18 prognostic factors for low-back pain? A cohort study of a general population of working age in  
19 Sweden. *J Rehabil Med*. 2017;49(7):591-7. doi: 10.2340/16501977-2249.  
20  
21  
22 24. Palmlof L, Holm LW, Alfredsson L, et al. The impact of work related physical activity and leisure  
23 physical activity on the risk and prognosis of neck pain - a population based cohort study on workers.  
24 *BMC Musculoskelet Disord*. 2016;17:219. doi: 10.1186/s12891-016-1080-1.  
25  
26  
27 25. de Zwart BC, Frings-Dresen MH, van Duivenbooden JC. Test-retest reliability of the Work  
28 Ability Index questionnaire. *Occup Med (Lond)*. 2002;52(4):177-81. Epub 2002/07/02.  
29  
30  
31 26. Radkiewich P W-BM, editor Psychometric Properties of Work Ability Index in the Light of  
32 Comparative Survey Study. 2nd International Symposium on Work Ability; 2004; Verona, Italy:  
33 Elsevier; 2005.  
34  
35  
36 27. Goldberg DP, Gater R, Sartorius N, et al. The validity of two versions of the GHQ in the WHO  
37 study of mental illness in general health care. *Psychol Med*. 1997;27(1):191-7.  
38  
39  
40 28. Lundin A, Hallgren M, Theobald H, et al. Validity of the 12-item version of the General Health  
41 Questionnaire in detecting depression in the general population. *Public Health*. 2016;136:66-74. doi:  
42 10.1016/j.puhe.2016.03.005.  
43  
44  
45 29. Andersson T, Alfredsson L, Kallberg H, et al. Calculating measures of biological interaction. *Eur*  
46 *J Epidemiol*. 2005;20(7):575-9.  
47  
48  
49  
50  
51  
52  
53  
54  
55  
56  
57  
58  
59  
60



- 1  
2  
3 30. Alavinia SM, van den Berg TI, van Duivenbooden C, et al. Impact of work-related factors,  
4 lifestyle, and work ability on sickness absence among Dutch construction workers. *Scand J Work*  
5 *Environ Health*. 2009;35(5):325-33.  
6  
7  
8  
9 31. Jaaskelainen A, Kausto J, Seitsamo J, et al. Work ability index and perceived work ability as  
10 predictors of disability pension: a prospective study among Finnish municipal employees. *Scand J*  
11 *Work Environ Health*. 2016. Epub 2016/10/06. doi: 10.5271/sjweh.3598 3598 [pii].  
12  
13  
14  
15 32. Yabe Y, Hagiwara Y, Sekiguchi T, et al. Sleep Disturbance Is Associated with New Onset and  
16 Continuation of Lower Back Pain: A Longitudinal Study among Survivors of the Great East Japan  
17 Earthquake. *Tohoku J Exp Med*. 2018;246(1):9-14. doi: 10.1620/tjem.246.9.  
18  
19  
20  
21 33. Gustafsson ML, Laaksonen C, Aromaa M, et al. The prevalence of neck-shoulder pain, back pain  
22 and psychological symptoms in association with daytime sleepiness - a prospective follow-up study of  
23 school children aged 10 to 15. *Scand J Pain*. 2018;18(3):389-97. doi: 10.1515/sjpain-2017-0166.  
24  
25  
26  
27 34. Sawada T, Matsudaira K, Muto Y, et al. Potential risk factors for onset of severe neck and  
28 shoulder discomfort (Katakori) in urban Japanese workers. *Ind Health*. 2016;54(3):230-6. doi:  
29 10.2486/indhealth.2015-0143.  
30  
31  
32  
33 35. Nitter AK, Pripp AH, Forseth KO. Are sleep problems and non-specific health complaints risk  
34 factors for chronic pain? A prospective population-based study with 17 year follow-up. *Scand J Pain*.  
35 2012;3(4):210-7. doi: 10.1016/j.sjpain.2012.04.001.  
36  
37  
38  
39 36. Generaal E, Vogelzangs N, Penninx BW, et al. Insomnia, Sleep Duration, Depressive Symptoms,  
40 and the Onset of Chronic Multisite Musculoskeletal Pain. *Sleep*. 2017;40(1). doi:  
41 10.1093/sleep/zsw030.  
42  
43  
44  
45 37. Haack M, Sanchez E, Mullington JM. Elevated inflammatory markers in response to prolonged  
46 sleep restriction are associated with increased pain experience in healthy volunteers. *Sleep*.  
47 2007;30(9):1145-52.  
48  
49  
50  
51 38. Koffel EA, Koffel JB, Gehrman PR. A meta-analysis of group cognitive behavioral therapy for  
52 insomnia. *Sleep Med Rev*. 2015;19:6-16. doi: 10.1016/j.smr.2014.05.001.  
53  
54  
55  
56  
57  
58  
59  
60

1  
2  
3 39. Ye YY, Zhang YF, Chen J, et al. Internet-Based Cognitive Behavioral Therapy for Insomnia  
4 (ICBT-i) Improves Comorbid Anxiety and Depression-A Meta-Analysis of Randomized Controlled  
5 Trials. *PLoS One*. 2015;10(11):e0142258. doi: 10.1371/journal.pone.0142258.  
6  
7  
8  
9  
10  
11  
12  
13  
14  
15  
16  
17  
18  
19  
20  
21  
22  
23  
24  
25  
26  
27  
28  
29  
30  
31  
32  
33  
34  
35  
36  
37  
38  
39  
40  
41  
42  
43  
44  
45  
46  
47  
48  
49  
50  
51  
52  
53  
54  
55  
56  
57  
58  
59  
60

For peer review only

1  
2  
3  
4  
5  
6  
7  
8  
9  
10  
11  
12  
13  
14  
15  
16  
17  
18  
19  
20  
21  
22  
23  
24  
25  
26  
27  
28  
29  
30  
31  
32  
33  
34  
35  
36  
37  
38  
39  
40  
41  
42  
43  
44  
45  
46  
47  
48  
49  
50  
51  
52  
53  
54  
55  
56  
57  
58  
59  
60

Figure 1. Flowchart of the inclusion of the study population and follow up.

\* NBP; neck and/or back pain.

For peer review only

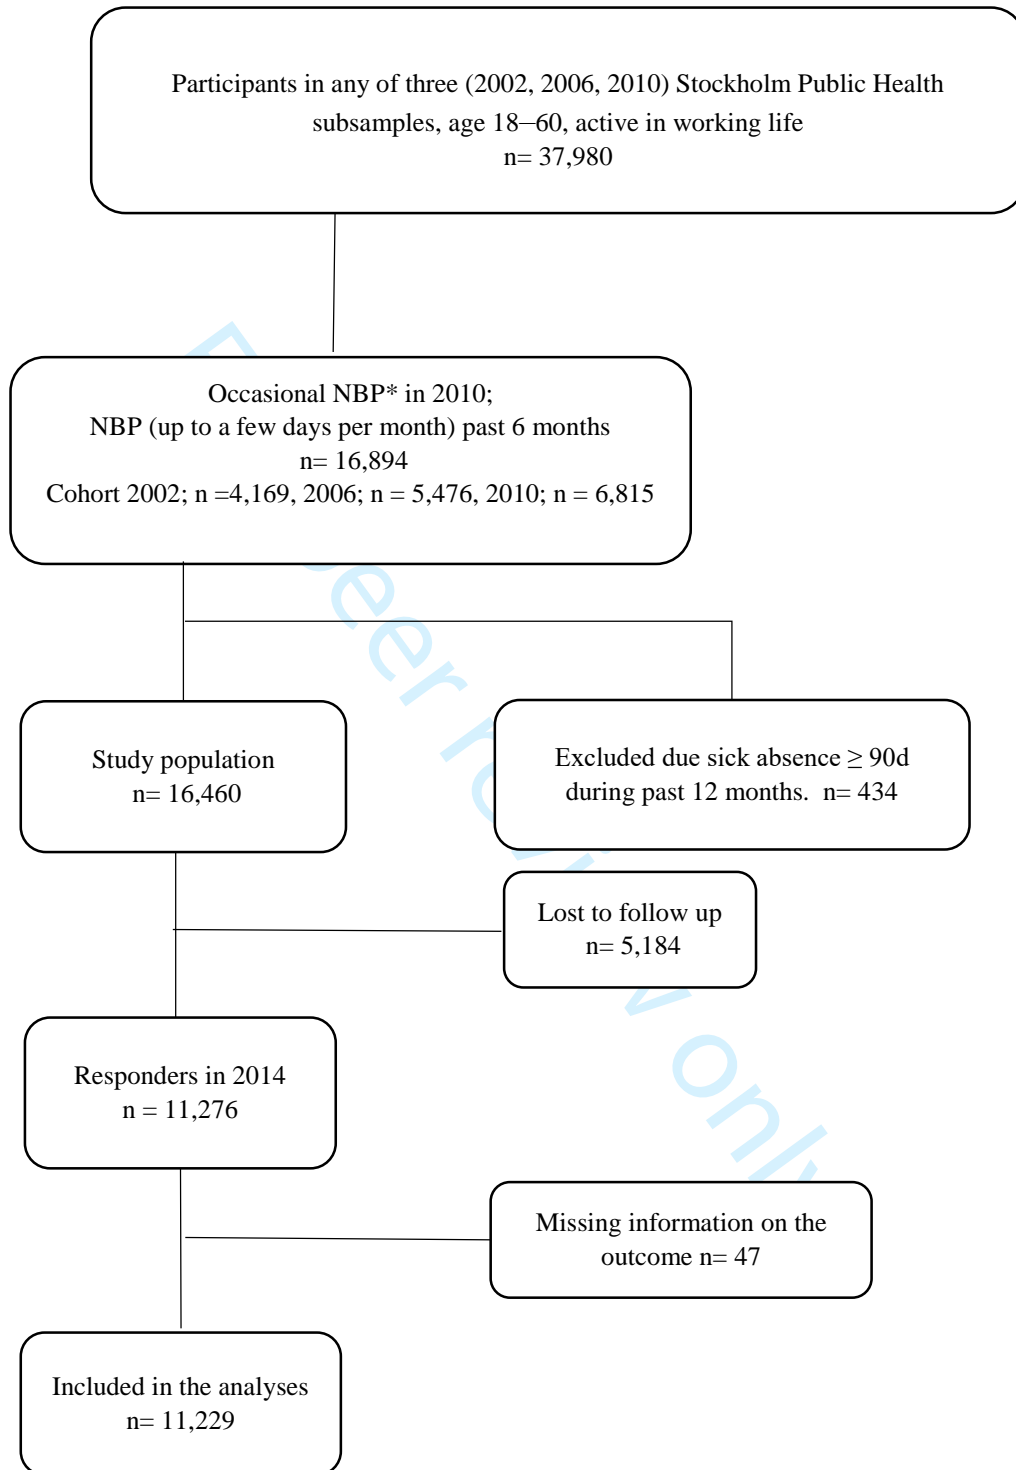

STROBE Statement—Checklist of items that should be included in reports of *cohort studies*

|                              | Item No | Recommendation                                                                                                                                                                                    | Considered |
|------------------------------|---------|---------------------------------------------------------------------------------------------------------------------------------------------------------------------------------------------------|------------|
| <b>Title and abstract</b>    | 1       | (a) Indicate the study's design with a commonly used term in the title or the abstract                                                                                                            | yes        |
|                              |         | (b) Provide in the abstract an informative and balanced summary of what was done and what was found                                                                                               | yes        |
| <b>Introduction</b>          |         |                                                                                                                                                                                                   |            |
| Background/rationale         | 2       | Explain the scientific background and rationale for the investigation being reported                                                                                                              | yes        |
| Objectives                   | 3       | State specific objectives, including any prespecified hypotheses                                                                                                                                  | yes        |
| <b>Methods</b>               |         |                                                                                                                                                                                                   |            |
| Study design                 | 4       | Present key elements of study design early in the paper                                                                                                                                           | yes        |
| Setting                      | 5       | Describe the setting, locations, and relevant dates, including periods of recruitment, exposure, follow-up, and data collection                                                                   | yes        |
| Participants                 | 6       | (a) Give the eligibility criteria, and the sources and methods of selection of participants. Describe methods of follow-up                                                                        | yes        |
|                              |         | (b) For matched studies, give matching criteria and number of exposed and unexposed                                                                                                               | NA         |
| Variables                    | 7       | Clearly define all outcomes, exposures, predictors, potential confounders, and effect modifiers. Give diagnostic criteria, if applicable                                                          | yes        |
| Data sources/<br>measurement | 8*      | For each variable of interest, give sources of data and details of methods of assessment (measurement). Describe comparability of assessment methods if there is more than one group              | yes        |
| Bias                         | 9       | Describe any efforts to address potential sources of bias                                                                                                                                         | yes        |
| Study size                   | 10      | Explain how the study size was arrived at                                                                                                                                                         | yes        |
| Quantitative<br>variables    | 11      | Explain how quantitative variables were handled in the analyses. If applicable, describe which groupings were chosen and why                                                                      | yes        |
| Statistical methods          | 12      | (a) Describe all statistical methods, including those used to control for confounding                                                                                                             | yes        |
|                              |         | (b) Describe any methods used to examine subgroups and interactions                                                                                                                               | yes        |
|                              |         | (c) Explain how missing data were addressed                                                                                                                                                       | yes        |
|                              |         | (d) If applicable, explain how loss to follow-up was addressed                                                                                                                                    | yes        |
|                              |         | (e) Describe any sensitivity analyses                                                                                                                                                             | NA         |
| <b>Results</b>               |         |                                                                                                                                                                                                   |            |
| Participants                 | 13*     | (a) Report numbers of individuals at each stage of study—eg numbers potentially eligible, examined for eligibility, confirmed eligible, included in the study, completing follow-up, and analysed | yes        |
|                              |         | (b) Give reasons for non-participation at each stage                                                                                                                                              | NA         |
|                              |         | (c) Consider use of a flow diagram                                                                                                                                                                | yes        |
| Descriptive data             | 14*     | (a) Give characteristics of study participants (eg demographic, clinical, social) and information on exposures and potential confounders                                                          | yes        |
|                              |         | (b) Indicate number of participants with missing data for each variable of interest                                                                                                               | yes        |

|                          |     |                                                                                                                                                                                                              |     |
|--------------------------|-----|--------------------------------------------------------------------------------------------------------------------------------------------------------------------------------------------------------------|-----|
|                          |     | (c) Summarise follow-up time (eg, average and total amount)                                                                                                                                                  | yes |
| Outcome data             | 15* | Report numbers of outcome events or summary measures over time                                                                                                                                               | yes |
| Main results             | 16  | (a) Give unadjusted estimates and, if applicable, confounder-adjusted estimates and their precision (eg, 95% confidence interval). Make clear which confounders were adjusted for and why they were included | yes |
|                          |     | (b) Report category boundaries when continuous variables were categorized                                                                                                                                    | yes |
|                          |     | (c) If relevant, consider translating estimates of relative risk into absolute risk for a meaningful time period                                                                                             |     |
| Other analyses           | 17  | Report other analyses done—eg analyses of subgroups and interactions, and sensitivity analyses                                                                                                               | yes |
| <b>Discussion</b>        |     |                                                                                                                                                                                                              |     |
| Key results              | 18  | Summarise key results with reference to study objectives                                                                                                                                                     | yes |
| Limitations              | 19  | Discuss limitations of the study, taking into account sources of potential bias or imprecision. Discuss both direction and magnitude of any potential bias                                                   | yes |
| Interpretation           | 20  | Give a cautious overall interpretation of results considering objectives, limitations, multiplicity of analyses, results from similar studies, and other relevant evidence                                   | yes |
| Generalisability         | 21  | Discuss the generalisability (external validity) of the study results                                                                                                                                        | yes |
| <b>Other information</b> |     |                                                                                                                                                                                                              |     |
| Funding                  | 22  | Give the source of funding and the role of the funders for the present study and, if applicable, for the original study on which the present article is based                                                | yes |

\*Give information separately for exposed and unexposed groups.

**Note:** An Explanation and Elaboration article discusses each checklist item and gives methodological background and published examples of transparent reporting. The STROBE checklist is best used in conjunction with this article (freely available on the Web sites of PLoS Medicine at <http://www.plosmedicine.org/>, Annals of Internal Medicine at <http://www.annals.org/>, and Epidemiology at <http://www.epidem.com/>). Information on the STROBE Initiative is available at <http://www.strobe-statement.org>.

# BMJ Open

## Risk of transition from occasional neck/back pain to long-duration activity limiting neck/back pain: the influence of poor work ability and sleep disturbances in the working population in Stockholm County

|                                 |                                                                                                                                                                                                                                                                                                                                                                                                                                                                  |
|---------------------------------|------------------------------------------------------------------------------------------------------------------------------------------------------------------------------------------------------------------------------------------------------------------------------------------------------------------------------------------------------------------------------------------------------------------------------------------------------------------|
| Journal:                        | <i>BMJ Open</i>                                                                                                                                                                                                                                                                                                                                                                                                                                                  |
| Manuscript ID                   | bmjopen-2019-033946.R1                                                                                                                                                                                                                                                                                                                                                                                                                                           |
| Article Type:                   | Original research                                                                                                                                                                                                                                                                                                                                                                                                                                                |
| Date Submitted by the Author:   | 04-Feb-2020                                                                                                                                                                                                                                                                                                                                                                                                                                                      |
| Complete List of Authors:       | Holm, Lena; Karolinska institutet, Institute of Environmental medicine<br>Bohman, Tony; Karolinska Institutet, Institute of Environmental Medicine<br>Lekander, Mats; Karolinska Institutet, Clinical Neuroscience; Stress<br>Research Institute, Stockholm University<br>Magnusson, C; Karolinska Institutet, Department of Public Health<br>Sciences<br>Skillgate, Eva; Karolinska institutet, Institute of Environmental medicine;<br>Sophiahemmet University |
| <b>Primary Subject Heading</b>: | Epidemiology                                                                                                                                                                                                                                                                                                                                                                                                                                                     |
| Secondary Subject Heading:      | Public health                                                                                                                                                                                                                                                                                                                                                                                                                                                    |
| Keywords:                       | EPIDEMIOLOGY, OCCUPATIONAL & INDUSTRIAL MEDICINE,<br>Musculoskeletal disorders < ORTHOPAEDIC & TRAUMA SURGERY                                                                                                                                                                                                                                                                                                                                                    |
|                                 |                                                                                                                                                                                                                                                                                                                                                                                                                                                                  |

SCHOLARONE™  
Manuscripts



I, the Submitting Author has the right to grant and does grant on behalf of all authors of the Work (as defined in the below author licence), an exclusive licence and/or a non-exclusive licence for contributions from authors who are: i) UK Crown employees; ii) where BMJ has agreed a CC-BY licence shall apply, and/or iii) in accordance with the terms applicable for US Federal Government officers or employees acting as part of their official duties; on a worldwide, perpetual, irrevocable, royalty-free basis to BMJ Publishing Group Ltd ("BMJ") its licensees and where the relevant Journal is co-owned by BMJ to the co-owners of the Journal, to publish the Work in this journal and any other BMJ products and to exploit all rights, as set out in our [licence](#).

The Submitting Author accepts and understands that any supply made under these terms is made by BMJ to the Submitting Author unless you are acting as an employee on behalf of your employer or a postgraduate student of an affiliated institution which is paying any applicable article publishing charge ("APC") for Open Access articles. Where the Submitting Author wishes to make the Work available on an Open Access basis (and intends to pay the relevant APC), the terms of reuse of such Open Access shall be governed by a Creative Commons licence – details of these licences and which [Creative Commons](#) licence will apply to this Work are set out in our licence referred to above.

Other than as permitted in any relevant BMJ Author's Self Archiving Policies, I confirm this Work has not been accepted for publication elsewhere, is not being considered for publication elsewhere and does not duplicate material already published. I confirm all authors consent to publication of this Work and authorise the granting of this licence.



1

2 Risk of transition from occasional neck/back pain to long-duration activity

3 limiting neck/back pain: the influence of poor work ability and sleep

4 disturbances in the working population in Stockholm County

5

6 Corresponding author: Lena W Holm, Institute of Environmental Medicine, Karolinska Institutet, Box  
7 2010, 171 77 STOCKHOLM, Sweden8 [Lena.Holm@ki.se](mailto:Lena.Holm@ki.se)

9 Phone

10 + 46 704 827479

11

12 Co-authors in order:

13 Tony Bohman, Institute of Environmental Medicine, Karolinska Institutet, Stockholm,

14 Sweden

15 Mats Lekander, Stress Research Institute, Stockholm University, Sweden

16 Cecilia Magnusson, Department of Clinical Neuroscience, Karolinska Institutet, Stockholm,

17 Sweden

18 Eva Skillgate, Sophiahemmet University, Stockholm, Sweden

19

20

21 Word count: 3,158

22

23

24

25

## ABSTRACT

**Objectives:** The prevalence of neck/back pain (NBP) is high worldwide. Limited number of studies have investigated workers with occasional NBP regarding the risk of developing long-duration activity limiting NBP (LNBP). The objectives were to assess (1) the effect of poor work ability and sleep disturbances in persons with occasional NBP on the risk of LNBP, (2) the interaction effect of these exposures.

**Design:** Cohort study based on three subsamples from the Stockholm Public Health Cohort.

**Settings:** The working population in Stockholm County.

**Participants:** Persons aged 18–60, reporting occasional NBP the past 6 months at baseline year 2010 (n=16,460).

**Measures:** Work ability was assessed with items from the Work Ability Index, perceived mental and/or physical work ability. Sleep disturbances were self-reported current mild/severe disturbances. The outcome in year 2014; reporting NBP the previous 6 months, occurring  $\geq$  couple of days per week and resulting in decreased work ability/restricted other daily activities. The additive effect of having both poor work ability and sleep disturbances was modelled with a dummy variable, including both exposures. Poisson log linear regression was used to calculate risk ratios (RR) and 95% confidence intervals (95% CI).

**Results:** At follow up, 9% had developed LNBP. Poor work ability and sleep disturbances were independent risk factors for LNBP; adjusted RR 1.7;(95%CI:1.4-2.0) and 1.4;(95%CI:1.2-1.5) respectively. No additive interaction was observed.

**Conclusion:** Workers with occasional NBP who have poor work ability and/or sleep disturbances are at risk of developing long-duration activity limiting NBP. Having both conditions does not exceed additive risk.

1  
2  
3 **1 ARTICLE SUMMARY**  
4  
5

6 **2 Strengths and limitations of this study**  
7  
8

- 9 • A longitudinal design and the exposures were measured at baseline and the outcome  
10 at follow-up four years later, thus the temporality has been taken care of.  
11  
12 • Large study population securing statistical power.  
13  
14 • A comprehensive control of confounding factors increases the possibility of causality.  
15  
16 • The main possible limitation is the misclassification of the exposures and the outcome  
17 and would, if any, result in an underestimation of the results.  
18  
19  
20  
21  
22  
23  
24  
25  
26  
27  
28  
29  
30  
31  
32  
33  
34  
35  
36  
37  
38  
39  
40  
41  
42  
43  
44  
45  
46  
47  
48  
49  
50  
51  
52  
53  
54  
55  
56  
57  
58  
59  
60

## 1 INTRODUCTION

2  
3  
4  
5  
6  
7 3 Despite decades of research aiming to understand how to prevent and treat long-duration  
8  
9 4 activity limiting neck and/or back pain (LNBP), these health conditions seem to increase  
10  
11 5 over time and are the leading causes of disability globally[1, 2]. Preventive measures are  
12  
13 6 necessary in order to reduce the burden of disease in society and require a knowledge of  
14  
15 7 modifiable risk factors. A recent systemic review of risk factors for the onset of “first  
16  
17 8 episode” neck pain concludes that personal as well as work-related factors play a role in the  
18  
19 9 development of neck pain, some of which are modifiable while others are not [3]. Another  
20  
21 10 systematic review concludes that physical activity may reduce the risk of long-duration low  
22  
23 11 back pain, [4] while the evidence of risk factors for recurrence of low back pain,[5] and neck  
24  
25 12 pain,[6] is sparse. Most people experience recurrent occasional short duration NBP, and it is  
26  
27 13 necessary to identify the factors involved in the transition to long-duration and activity  
28  
29 14 limiting pain conditions in order to address these in prevention measures.

30  
31  
32  
33  
34  
35 15 Self-perceived work ability is a concept which has been widely studied in occupational  
36  
37 16 settings, often as a predictor of future sickness absence,[7, 8], but it has also been shown to  
38  
39 17 be associated with outcomes such as health-related production loss,[9] and work turnover  
40  
41 18 [10]. A frequently used measurement is the Work Ability Index (WAI) and its subscales.  
42  
43 19 WAI consists of seven items including two about perceived work ability in relation to  
44  
45 20 physical and mental work demands[11]. Ahlstrom et al.,[12] used both the full WAI and the  
46  
47 21 single item WAI-S; “current work ability compared with the lifetime best”, and found that  
48  
49 22 both were associated with sickness absenteeism over a 12-month period . Lundin et al. found  
50  
51 23 that this single WAI item had an excellent ability to predict long-term sickness absence, and  
52  
53 24 also that the two items covering perceived mental and physical work ability had acceptable  
54  
55 25 predictive validity [13].  
56  
57  
58  
59  
60

1 Little is known about the impact of perceived work ability on the development of NBP. A  
2 recent clinical study of primary care patients with low back pain found an association  
3 between higher work ability measured with the WAI item “current work ability compared  
4 with the lifetime best” and improvement in work ability, pain and quality of life at follow  
5 up[14], but other than this, the topic appears to have escaped scientific investigation despite  
6 the construct’s connection to future ill-health.

7 It is well-established that impaired sleep increases the risk of several health problems of  
8 varying severity, for instance all-cause cardiopulmonary mortality, respiratory tract  
9 infections, hypertension as well as depression[15-17]. Current evidence suggests that sleep  
10 disturbances are a risk factor for the onset of NBP [18], as well as a prognostic factor in  
11 subacute or long-lasting pain conditions,[19, 20], and for sickness absence[21].

12 Hypothesizing that poor work ability and sleep disturbances are independent risk factors for  
13 the development of LNBP, it is possible that having both factors results in a synergistic  
14 effect.

15 Few studies have focused on workers with occasional NBP and their risk of LNBP. We have  
16 previously studied job strain and sleep disturbances,[22, 23] regarding the risk of LNBP and  
17 have found that high job strain (high job demands/low job control) and active jobs (high job  
18 demands/high job control) as well as sleep disturbances were independent risk factors, but the  
19 estimates were modest for both conditions. The results also indicated that sleep disturbances  
20 may modify the association between high job strain and long-duration activity limiting neck  
21 pain, [22], but this was not the case for back pain[23]. In another study, also based on  
22 workers with occasional neck pain, work-related and leisure time physical activity were  
23 assessed for the risk of long-duration activity limiting neck pain, but no associations were  
24 found[24].

1  
2  
3 1 In summary, there is some evidence that poor perceived work ability and sleep disturbances  
4  
5 2 contribute both to the onset of and the recovery from pain conditions, however little is  
6  
7 3 known about the transitions from occasional pain to long-duration pain that affects daily  
8  
9 4 activities, including the spectra from minor restrictions to full work disability. The primary  
10  
11 5 aim of this study was to assess the effect of poor mental and/or poor physical work ability  
12  
13 6 and sleep disturbances, respectively, in persons with occasional NBP, for the risk of  
14  
15 7 developing LNBP. A secondary aim was to assess the additive interaction effect between  
16  
17 8 these two exposures.  
18  
19  
20  
21  
22  
23  
24  
25  
26  
27  
28  
29  
30  
31  
32  
33  
34  
35  
36  
37  
38  
39  
40  
41  
42  
43  
44  
45  
46  
47  
48  
49  
50  
51  
52  
53  
54  
55  
56  
57  
58  
59  
60

For peer review only

## 1 MATERIAL AND METHODS

### 2 Design, source and study population

3 A prospective cohort was formed based on three subsamples of the Stockholm Public Health  
4 Cohort; one recruited in year 2002 and followed up in year 2006, 2010 and 2014, one formed  
5 in 2006 and followed up in 2010 and 2014, and a third formed in 2010 and followed up in  
6 2014. We used the 2010 and 2014 waves as baseline and follow-up, respectively, in all  
7 subsamples. The data used (i.e. the questions) were defined in the same way in these  
8 subsamples in 2010 and 2014.

9 Men and women, aged 18–60 who were participating in any of the three subsamples in 2010  
10 were included if they reported NBP during the past six months up to a couple of days per  
11 month but not more often, and were responding to any of two items from the WAI); physical  
12 and mental capacity in relation to work demands (indicating that the persons were active in  
13 working life) at baseline. NBP was defined based on the questions: “Have you had any pain  
14 in your upper back or neck in the preceding 6 months?”, and “Have you had any pain in your  
15 lower back in the preceding 6 months?”. Persons who responded “Yes, a couple of days per  
16 month or less frequent” to one or both of these questions fulfilled the criteria for NBP.  
17 Persons with sickness absence of more than 90 days during the past 12 months were  
18 excluded.

### 19 Exposures

20 The exposure self-perceived physical work ability and mental work ability in relation to work  
21 demands was measured with two questions from the WAI. The psychometric properties of  
22 this instrument have been tested,[25, 26], and it is considered stable at a group level,  
23 predictive and internally coherent. Physical work ability was measured with the question:  
24 “How do you rate your current work ability with respect to the physical demands of your

1 work?" The answering alternatives were: "Very good", "Good", "Moderate", "Rather poor",  
2 and "Poor". The variable was dichotomised into poor work ability ("Moderate", "Rather  
3 poor" or "Poor"), and good work ability ("Very good" or "Rather good"). Mental work  
4 ability was measured with the question: "How do you rate your current work ability with  
5 respect to the psychological and mental demands of your work?" The alternative response  
6 for mental work ability were the same as for physical work ability and the variable was  
7 dichotomised in the same way. The two items were then merged into "poor work ability"  
8 ("Moderate", "Rather poor", "Poor" in one or both of the items), whereas those scoring  
9 "Good" or "Very good" on both items, were categorised as having "Good work ability" (non-  
10 exposed).

11 The exposure sleep disturbances were defined as having responded "Yes mild" or "Yes  
12 severe" to the question "Do you have sleep disturbances?". Those responding "No" were  
13 classified as unexposed.

#### 14 **Outcome**

15 The outcome LNBP was operationalised by the response from the 2014 questionnaire and  
16 was defined as having reported NBP during the past 6 months, occurring a couple of days per  
17 week or more often, and resulting in a decreased work ability/restricted other daily activity.

#### 18 **Confounding control**

19 We investigated several potential confounders, based on relevance and on the literature on  
20 risk factors for long lasting NBP (table 1). For the work ability exposure, one model was run,  
21 adding sleep disturbances as a confounder, and similarly for the model sleep disturbances,  
22 one model was run adding work ability as a confounder.

23



1 Table 1. Description of the variables, tested as potential confounders

| Variables                       | Operationalisation <sup>1</sup>                                                                                                                                                                                                                                |
|---------------------------------|----------------------------------------------------------------------------------------------------------------------------------------------------------------------------------------------------------------------------------------------------------------|
| Age                             | Continuous and categorised in 5-year intervals                                                                                                                                                                                                                 |
| Sex                             | Man/Woman                                                                                                                                                                                                                                                      |
| Socioeconomic Status            | Based on occupational class, classified according to the Swedish socioeconomic classification, developed by Statistics Sweden and retrieved from National Register in Sweden: A combination of current occupation and highest educational level (6 categories) |
| Body Mass Index                 | Continuous and categorised into Underweight <18.5, Normal weight 18.5–24.9, Overweight 25–29.9, Obese $\geq 30$                                                                                                                                                |
| Daily Smoking                   | Question: “Are you currently smoking daily or almost daily” Response alternatives: “Yes,” “No”                                                                                                                                                                 |
| Sedentary Leisure Time Activity | “State your average physical activity during the past 12 months”; Leisure time sitting; watching, TV, reading. The response alternatives were added up and categorised into <2 hrs/day, 2-3 hrs/day, and more than 3 hrs/day                                   |
| Physical Activity               | “State your physical activity (PA) during the past 12 months” categorised into Walking/cycling less than 20 min/day AND other leisure time PA less than 1 hr/week vs PA (walking/biking, other PA) exceeding these time durations                              |

|                        |                                                                                                                                                                                       |
|------------------------|---------------------------------------------------------------------------------------------------------------------------------------------------------------------------------------|
| Household Composition  | Three categories; adult living alone, adult living with other adult(s) with/without children, adult living with children                                                              |
| Psychological Distress | Derived from the General Health Questionnaire (GHQ12) [27, 28] and categorized into < 3, 3–7 and > 7.                                                                                 |
| Long-standing illness  | The question “Do you have any long-duration sickness, health problems as a result of an accident, handicap or other long-duration health problem?” Response alternatives: “Yes “,”No” |

<sup>1</sup> All variables were retrieved from the baseline questionnaire except Socioeconomic Status, which is retrieved from National Swedish Registers

1

## 2 **Statistical Methods**

3 Generalized Linear models with Poisson log linear regression was used to estimate the  
4 association between the exposures and the outcome. The results are presented as a risk ratio  
5 (RR) with 95% confidence intervals (CI). We ran four adjusted models. For work ability, the  
6 first model excluding and the second including sleep disturbances, and for sleep disturbances,  
7 one model excluding and the second including work ability. This was done since it might be  
8 argued that these factors act as mediators rather than confounders.

9 To assess whether the interaction between the two risk factors poor work ability and sleep  
10 disturbances deviated from additivity regarding the risk of developing LNBP, we created a  
11 dummy variable: having poor work ability/no sleep disturbances, no poor work ability/sleep  
12 disturbances, both poor work ability and sleep disturbances[29]. Having none of the  
13 conditions served as a reference, and this model was run in a Poisson log linear regression.

14 Factors potentially confounding the effect between the exposures and the outcome were  
15 added one at the time to each univariate model. If the crude estimate changed by 5% or more,  
16 the factor was considered a confounder and was included in the adjusted model. We also  
17 added a variable including the origin of the three subsamples, since, for two of the merged  
18 subsamples, the first and second follow-up wave respectively were used as baseline in our  
19 study.

20 To assess the potential selection bias, attrition analysis was conducted by comparing the  
21 prevalence of the main exposure, work ability, among those lost to follow-up and those with  
22 missing data on any of the outcome variables, with the prevalence of this exposure among  
23 those successfully followed.

24 IBM® SPSS Statistics version 25 was used.

1  
2  
3  
4  
5  
6  
7  
8  
9  
10  
11  
12  
13  
14  
15  
16  
17  
18  
19  
20  
21  
22  
23  
24  
25  
26  
27  
28  
29  
30  
31  
32  
33  
34  
35  
36  
37  
38  
39  
40  
41  
42  
43  
44  
45  
46  
47  
48  
49  
50  
51  
52  
53  
54  
55  
56  
57  
58  
59  
60

1 **Patient and Public Involvement**

2 Patients or the public were not involved in the design or planning of the study.

For peer review only

## 1     **RESULTS**

2     The total study population was 16,460. Of those, 11,276 were successfully followed up and  
3     11,229 responded to the back/neck pain questions, which gives a follow-up rate of 68%,  
4     (figure 1).

5     Of the 16,460 participants, 1,989 (12%) reported poor work ability and 1,392 (8%) reported  
6     mild or severe sleep disturbances at baseline. A detailed description of the study population is  
7     displayed in table 2 and stratified into those with poor versus good work ability. Age and sex  
8     were relatively evenly distributed across the two groups. The most common occupations  
9     represented were intermediate non-manual workers and employed/self-employed  
10    professionals/higher civil servants/executives.

1

2 Table 2. Baseline characteristics of the study population in relation to work ability

3 (n=16,460)

| Characteristic                                        | Good work ability |       | Poor <sup>1</sup> work ability |       |
|-------------------------------------------------------|-------------------|-------|--------------------------------|-------|
|                                                       | n: 14,471 (88%)   |       | n: 1,989 (12%)                 |       |
|                                                       | n                 | %     | n                              | %     |
| Female                                                | 8,279             | 57    | 1,252                          | 63    |
| Age Mean (SD)                                         | 43.2              | 10.0  | 42.9                           | 10.5  |
| Age Median (min-max)                                  | 44                | 18–60 | 44                             | 18–60 |
| Socioeconomic Status                                  |                   |       |                                |       |
| Unskilled/semiskilled workers                         | 1,498             | 11    | 406                            | 22    |
| Skilled workers                                       | 1,401             | 10    | 248                            | 13    |
| Assistant non-manual workers                          | 1,932             | 14    | 244                            | 13    |
| Intermediate non-manual workers                       | 4,164             | 30    | 468                            | 25    |
| Employed/self-employed professionals,                 | 3,501             | 25    | 333                            | 18    |
| Self-employed other than professionals                | 1,283             | 9     | 169                            | 9     |
| Household composition                                 |                   |       |                                |       |
| Living together with adult (with or without children) | 11,628            | 81    | 1,464                          | 74    |
| Living with children                                  | 805               | 5     | 147                            | 7     |
| Living alone                                          | 1,990             | 14    | 369                            | 19    |
| Body Mass Index, kg/m <sup>2</sup>                    |                   |       |                                |       |
| < 18.5                                                | 187               | 1     | 39                             | 2     |
| 18.5–24.9                                             | 7,978             | 56    | 1,022                          | 53    |
| 25.0–29.9                                             | 4,628             | 33    | 600                            | 31    |

|                                              |        |        |    |       |    |
|----------------------------------------------|--------|--------|----|-------|----|
|                                              | ≥ 30.0 | 1,446  | 10 | 281   | 15 |
| Daily Smoking                                |        | 1,424  | 10 | 320   | 16 |
| Physical Activity <sup>2</sup>               |        |        |    |       |    |
| None or low (less than 1 hr/w)               |        | 1,989  | 14 | 445   | 23 |
| Intermediate                                 |        | 8,730  | 60 | 1,149 | 58 |
| High                                         |        | 3,288  | 23 | 336   | 17 |
| Very High (more than 5 hrs /w)               |        | 424    | 3  | 47    | 2  |
| Sedentary leisure time (TV, reading etc.)    |        |        |    |       |    |
| < 2 hrs/day                                  |        | 9,111  | 63 | 1,038 | 53 |
| 2–3 hrs/day                                  |        | 3,740  | 26 | 578   | 29 |
| More than 3 hrs/day                          |        | 1,558  | 11 | 360   | 18 |
| Sleep disturbances                           |        |        |    |       |    |
| No                                           |        | 10,478 | 73 | 914   | 47 |
| Yes, mild                                    |        | 355    | 25 | 866   | 44 |
| Yes, severe                                  |        | 237    | 2  | 169   | 9  |
| Psychological Distress (GHQ12 <sup>3</sup> ) |        |        |    |       |    |
| No (0-2)                                     |        | 12,250 | 85 | 1,005 | 51 |
| Mild (3-6)                                   |        | 1,590  | 11 | 485   | 25 |
| Severe (7-12)                                |        | 602    | 4  | 493   | 25 |
| Long-standing illness                        |        | 8,200  | 22 | 3,837 | 54 |

<sup>1</sup> WAI (Work Ability Index) items[11], self-perceived physical and/or mental work ability in relation to job demands and defined as moderate, rather poor, poor. <sup>2</sup> Defined as a combination of cycling/walking and other physical activity expressed as hours per week

1  
2  
3  
4  
5  
6  
7  
8  
9  
10  
11  
12  
13  
14  
15  
16  
17  
18  
19  
20  
21  
22  
23  
24  
25  
26  
27  
28  
29  
30  
31  
32  
33  
34  
35  
36  
37  
38  
39  
40  
41  
42  
43  
44  
45  
46  
47  
48  
49  
50  
51  
52  
53  
54  
55  
56  
57  
58  
59  
60

1    <sup>3</sup> GHQ12 General Health Questionnaire – 12 items[27].Total numbers across rows differ due  
2    to internal missing values  
3

For peer review only



1

2 In 2014, 1,056 (9%) of the 11,229 responders had developed LNBP. Those successfully  
3 followed-up were compared with those who dropped out/had missing information on the  
4 outcome (n=5,231), with respect to the main exposure work ability. Fifteen percent of the  
5 dropouts had poor work ability compared to 11% among those successfully followed-up.

6 The results of the Poisson log linear regression analyses are presented in tables 3 and 4. Of  
7 those with poor work ability, 214 (18%) participants developed LNBP. The confounders in  
8 this association were socioeconomic status (SES) and long-standing illness and were  
9 therefore adjusted for, yielding an RR of 1.8 (95% CI;1.6–2.2). Adding sleep disturbances to  
10 the model yields an RR of 1.7 (95% CI; 1.4–2.0) (table 3 a).

11 Of those with sleep disturbances, 411 (13%) developed LNBP. Socioeconomic status (SES)  
12 and long-standing illness were confounders also in the association between sleep disturbances  
13 and the outcome (adjusted RR 1.5 (95%CI; 1.3–1.7)). Adding poor work ability to the model  
14 yields an RR of 1.4 (95%CI:1.2–1.6) (table 3b).

15

Table 3. Association between poor work ability<sup>1</sup> (a) and sleep disturbances<sup>2</sup> (b) and long-duration activity limiting neck -and/or back pain. Risk Ratio (RR) and 95% Confidence Interval (95%CI)

| (a)                             | Cases/     | Crude RR | 95 % CI   | Model 1 <sup>3</sup> Adjusted RR | 95% CI    | Model 2 <sup>4</sup> Adjusted RR | 95% CI    |
|---------------------------------|------------|----------|-----------|----------------------------------|-----------|----------------------------------|-----------|
|                                 | All        |          |           |                                  |           |                                  |           |
| Good work ability               | 842/10,011 | ref      |           | ref                              |           | ref                              |           |
| Poor work ability <sup>1</sup>  | 214/1,218  | 2.1      | (1.8-2.4) | 1.8                              | (1.6-2.1) | 1.7                              | (1.4-2.0) |
| (b)                             | Cases/     | Crude RR | 95 % CI   | Model 1 <sup>3</sup> Adjusted RR | 95% CI    | Model 2 <sup>5</sup> Adjusted RR | 95% CI    |
|                                 | All        |          |           |                                  |           |                                  |           |
| Good sleep                      | 625/7,833  | ref      |           | ref                              |           | ref                              |           |
| Sleep disturbances <sup>2</sup> | 411/3,257  | 1.6      | (1.4-1.8) | 1.5                              | (1.3-1.7) | 1.4                              | (1.2-1.5) |

1  
2  
3 <sup>1</sup> WAI (Work Ability Index) items, self-perceived physical and/or mental work ability in relation to job demands and defined as moderate, rather  
4 poor, poor. <sup>2</sup> Sleep disturbances = current mild or severe sleep disturbances. <sup>3</sup> Adjusted for socioeconomic status, chronic comorbidity  
5 and subsample (year 2002, 2006, 2010). <sup>4</sup> Adjusted for socioeconomic status, chronic comorbidity, sleep disturbances and subsample  
6 (year 2002, 2006, 2010). <sup>5</sup> Adjusted for socioeconomic status, chronic comorbidity, work ability and subsample (year 2002, 2006, 2010)  
7  
8  
9  
10  
11  
12  
13  
14  
15  
16  
17  
18  
19  
20  
21  
22  
23  
24  
25  
26  
27  
28  
29  
30  
31  
32  
33  
34  
35  
36  
37  
38  
39  
40  
41  
42  
43  
44  
45  
46

For peer review only

1  
2  
3 1  
4  
5 2 The analysis including the interaction variable, poor work ability and sleep disturbances,  
6  
7 3 showed after adjusting for SES and chronic comorbidity that those solely with poor WAI had  
8  
9  
10 4 a doubly increased risk of developing LNBP (RR 2.1 (95% CI; 1.7–2.6) compared to those  
11  
12 5 with none of the risk factors. Having sleep disturbances solely yields an RR 1.5 (95% CI;  
13  
14 6 1.3–1.7) and having both conditions was similar to having poor WAI only (RR 2.1  
15  
16 7 (95%CI;1.7–2.6) (table 4).  
17  
18  
19  
20 8  
21  
22  
23  
24  
25  
26  
27  
28  
29  
30  
31  
32  
33  
34  
35  
36  
37  
38  
39  
40  
41  
42  
43  
44  
45  
46  
47  
48  
49  
50  
51  
52  
53  
54  
55  
56  
57  
58  
59  
60

For peer review only

Table 4. Association between different combinations of poor work ability<sup>1</sup> and sleep disturbances<sup>2</sup>, and long-duration activity limiting neck - and/or back pain.

Risk Ratio (RR) and 95% Confidence Interval (95%CI)

|                                           | Cases/ All | Crude RR | 95 % CI   | Adjusted <sup>3</sup> RR | 95% CI    |
|-------------------------------------------|------------|----------|-----------|--------------------------|-----------|
| Good work ability/ No sleep disturbances  | 534/7,281  | ref      |           | ref                      |           |
| Poor work ability / No sleep disturbances | 91/552     | 2.4      | (2.0-3.0) | 2.1                      | (1.7-2.6) |
| Good work ability /Sleep disturbances     | 294/2,610  | 1.5      | (1.3-1.8) | 1.5                      | (1.3-1.7) |
| Poor work ability /Sleep disturbances     | 117/647    | 2.4      | (1.9-2.9) | 2.1                      | (1.6-2.6) |

<sup>1</sup> Assessed with WAI (Work Ability Index) items, self-perceived physical and/or mental work ability in relation to job demands and defined as moderate, rather poor, poor. <sup>2</sup> Sleep disturbances = current mild or severe sleep disturbances. <sup>3</sup> Adjusted for socioeconomic status, long-standing illness and subsample (year 2002, 2006, 2010)

1  
2  
3 1  
4  
5 2 **DISCUSSION**  
6

7 3 The results of this study suggest that persons with occasional NBP who assess their work  
8  
9 4 ability (mental and/or physical) as poor, in relation to the work demands, have a higher risk  
10  
11 5 of developing LNBP. Also, those who reported sleep disturbances have a higher risk of such  
12  
13 6 an outcome. The risk in persons with both poor work ability and sleep disturbances was not  
14  
15 7 more than additive.  
16  
17

18  
19 8 When it comes to research about work ability and NBP, we only found one earlier study,  
20  
21 9 namely on primary care patients with various durations of low back pain. In that prognostic  
22  
23 10 study, they used another item from the WAI when predicting decrease in disability[14], thus  
24  
25 11 it is not comparable to our risk study.  
26  
27

28  
29 12 The majority of published studies using items from the WAI, when measuring work ability  
30  
31 13 and its impact on health, have sickness absence as the outcome[7, 8, 30, 31]. In the present  
32  
33 14 study, we note that only 1/3 of the cases had a history of sickness absence in the year prior to  
34  
35 15 the follow up, thus our study adds new knowledge to this topic, since the outcome in our  
36  
37 16 study is not equal or similar to sickness absenteeism or disability pension investigated in  
38  
39 17 previous studies.  
40  
41

42  
43 18 Perceived physical and/or mental work ability in relation to work demands are theoretically  
44  
45 19 modifiable factors, although they are not always easy to change without changing job or  
46  
47 20 employer. Poor work ability has been shown to be associated with high work turnover[10],  
48  
49 21 thus job change may be an option in order to prevent long-duration activity limiting pain  
50  
51 22 conditions. Another option might be that the employee in dialogue with their employer  
52  
53 23 investigates the possibilities of changes within the current job, or that the individual takes  
54  
55 24 their own responsibility for physical and mental health maintenances through self-care such  
56  
57 25 as leisure time physical activity or similar actions.  
58  
59  
60

1  
2  
3 1 Several studies have shown that sleep disturbance or daytime sleepiness are risk factors for  
4  
5 2 the onset of NBP as well as a factor that impedes recovery[32-34], and are also a risk factor  
6  
7 3 for the onset of musculoskeletal pain in general[35, 36]. One likely mechanism behind the  
8  
9 4 association between sleep disturbances and pain is elevated levels of inflammatory markers  
10  
11 5 triggering the onset of, and continuation of pain[37]. We have, however, not found any  
12  
13 6 previous studies based on a population with occasional NBP. Sleep disturbance is a  
14  
15 7 modifiable factor, and cognitive behaviour therapy is a recommended treatment for insomnia,  
16  
17 8 the most common sleep disturbance[38]. There is also some evidence that cognitive therapy  
18  
19 9 for insomnia may improve other health problems such as depression and anxiety; thus,  
20  
21 10 treating sleep problems may also improve comorbid conditions that in turn are often related  
22  
23 11 to pain [39]. It is, therefore, possible that treating sleep problems in persons with occasional  
24  
25 12 NBP may reduce the risk of activity limiting pain, but this needs to be evaluated in future  
26  
27 13 studies.

#### 14 **Strengths**

15 This is a population-based longitudinal study covering residents in the largest county in  
16 Sweden with a large sample size allowing interaction analysis. Another strength is the  
17 thorough control for possible confounding factors in the analyses. Furthermore,  
18 although almost 1/3 of the study participants had dropped out at the follow up in 2014, the  
19 prevalence of the main exposure was 11% and 15% of these successfully followed versus the  
20 dropouts. We believe that selection bias has a minor impact on the results, although this  
21 cannot be fully ruled out. If the exposed participants who dropped out were less likely to have  
22 the outcome compared to the exposed participants who were successfully followed, we may  
23 have overestimated the true effect. We excluded those who in 2010 reported that they had a  
24 sickness absence of more than 90 days during the 12 months preceding entry to the study.

1  
2  
3 1 The reason for this was to avoid the issue of major morbidity influencing the participants'  
4  
5 2 judgment of their work ability for illness not related to NBP, and thus also reducing the risk  
6  
7  
8 3 of null findings when there would be a true risk.  
9

#### 10 4 **Limitations**

11  
12  
13  
14 5 The main limitations are possible misclassification due to imprecise or time-varying  
15  
16 6 exposure, resulting in a non-differential exposure misclassification which, if any, will have  
17  
18 7 led to a dilution of the effect estimate. In particular, we believe that the way sleep  
19  
20 8 disturbances were measured may be prone to misclassification. One single question with  
21  
22 9 three response alternatives may not fully capture the concept of sleep disturbances.  
23  
24  
25  
26 10 Also, work ability may be prone to non-differential misclassification, since we did not have  
27  
28 11 access to the full WAI. However, these single questions on perceived work ability in relation  
29  
30 12 to job demands have previously been validated, both against the full WAI[13] and when used  
31  
32 13 as predictors for sickness absences with acceptable results[12]. Nevertheless, if anything,  
33  
34 14 such misclassification bias would lead to diluted associations. Furthermore, the exposure  
35  
36 15 work ability may change over the follow-up period, most likely due to a job change. Exactly  
37  
38 16 the same proportion among cases and non-cases had changed job/new employer in 2014  
39  
40 17 compared to 2010, (28%), which to some extent reduces the likelihood of differential  
41  
42 18 misclassification of work ability.  
43  
44  
45  
46

47 19 There is also a risk of residual confounding due to unprecise measure of confounding factors,  
48  
49 20 such as physical activity, sedentary leisure time activities and smoking, as well as  
50  
51 21 unmeasured confounding. Such bias may have led to under or overestimation of the results.  
52  
53 22 During a four-year follow-up, time varying prognostic factors, among others treatment for  
54  
55 23 NBP, may have had an impact on the risk of developing LNBP. Since these are present  
56  
57  
58  
59  
60



1 among exposed as well as un-exposed, the most likely effect of such factors would be a  
2 dilution of the associations reported.

3 We claim that the results of our study are generalizable to other settings on persons active in  
4 working life. Even though the study showed that the absolute risk of LNBP is modest, with  
5 less than 10% of those with occasional NBP developing the more severe condition according  
6 to our definition, it is a major and expensive public health problem that accumulates over  
7 time.

8 This study adds knowledge to the area of why persons with occasional NBP develop long-  
9 duration and activity limiting NBP. Paying attention to persons with occasional NBP who  
10 have poor perceived work ability and/or sleep disturbances, and taking action accordingly,  
11 may reduce this burden of ill-health. We welcome future research on the effect of  
12 occupational preventive measures for workers with poor work ability.

### 13 **ACKNOWLEDGEMENTS**

14 We thank Peeter Fredlund, Research Statistician at Karolinska Institutet and SLL Centre for  
15 Epidemiology and Community Medicine, Stockholm, for providing us with the data and for  
16 the prompt answers to our questions about the variables.

### 17 **AUTHOR CONTRIBUTIONS**

18 LWH, TB, ML and ES contributed to the conceptualisation and methodology of the study  
19 which was approved by CM. CM provided the data resources. LWH made the statistical  
20 analyses based on a protocol approved by the co-authors. LWH wrote a draft of the  
21 manuscript. All authors contributed to the interpretation of the results and critically revised  
22 the manuscript and finally approved the last version.

### 23 **FUNDING**

1  
2  
3 1 The study was funded by AFA- Insurance Grant No 170095. The funder had no involvement  
4  
5 2 in any of the steps of the manuscript preparation.  
6  
7

### 8 3 **COMPETING INTERESTS**

9  
10  
11 4 Dr:s Eva Skillgate and Lena Holm are scientific consultants at the Scandinavian College of  
12  
13 5 Naprapathic Manual Medicine and members of their Scientific Board.  
14  
15

### 16 6 **ETHICS APPROVAL**

17  
18  
19 7 Ethical approval was obtained from the regional ethical review board in Stockholm (Dnr;  
20  
21 8 2007/545-31, 2013/497-32 and 2015/1204-32). The questionnaires included information  
22  
23 9 about handling of personal data, and the participants accepted the use of their data by  
24  
25 10 answering to the questionnaires (written informed consent).  
26  
27  
28

### 29 11 **DATA SHARING STATEMENT**

30  
31  
32 12 Due to ethical restrictions and laws (GDPR) of disclosing personal data, authors have to seek  
33  
34 13 permission to allow us to make the data used in this study available. Data will be available  
35  
36 14 upon request after permission is granted from the Karolinska Institutet's Ethics Review Board  
37  
38 15 in Stockholm. Inquiries for data access should first be sent to [eva.skillgate@ki.se](mailto:eva.skillgate@ki.se), who will  
39  
40 16 then contact the ethics board for permission to openly share the data.  
41  
42  
43  
44  
45  
46  
47  
48  
49  
50  
51  
52  
53  
54  
55  
56  
57  
58  
59  
60

## REFERENCES

1. Hoy D, Bain C, Williams G, et al. A systematic review of the global prevalence of low back pain. *Arthritis Rheum.* 2012;64(6):2028-37. Epub 2012/01/11. doi: 10.1002/art.34347.
2. Hoy D, March L, Woolf A, et al. The global burden of neck pain: estimates from the global burden of disease 2010 study. *Ann Rheum Dis.* 2014;73(7):1309-15. doi: 10.1136/annrheumdis-2013-204431.
3. Kim R, Wiest C, Clark K, Cook C, et al. Identifying risk factors for first-episode neck pain: A systematic review. *Musculoskelet Sci Pract.* 2018;33:77-83. doi: 10.1016/j.msksp.2017.11.007.
4. Shiri R, Falah-Hassani K. Does leisure time physical activity protect against low back pain? Systematic review and meta-analysis of 36 prospective cohort studies. *Br J Sports Med.* 2017;51(19):1410-8. doi: 10.1136/bjsports-2016-097352.
5. da Silva T, Mills K, Brown BT, et al. Risk of Recurrence of Low Back Pain: A Systematic Review. *J Orthop Sports Phys Ther.* 2017;47(5):305-13. doi: 10.2519/jospt.2017.7415.
6. Langenfeld A, Humphreys BK, Swanenburg J, et al. Prognostic factors for recurrences in neck pain patients up to 1 year after chiropractic care. *J Manipulative Physiol Ther.* 2015;38(7):458-64. doi: 10.1016/j.jmpt.2015.06.014.
7. Alavinia SM, de Boer AG, van Duivenbooden JC, et al. Determinants of work ability and its predictive value for disability. *Occup Med (Lond).* 2009;59(1):32-7. Epub 2008/12/17. doi: 10.1093/occmed/kqn148 kqn148[pii].
8. Kinnunen U, Natti J. Work ability score and future work ability as predictors of register-based disability pension and long-term sickness absence: A three-year follow-up study. *Scand J Public Health.* 2018;46(3):321-30. doi: 10.1177/1403494817745190.
9. Lohela Karlsson M, Busch H, Aboagye E, Jensen I. Validation of a measure of health-related production loss: construct validity and responsiveness - a cohort study. *BMC Public Health.* 2015;15:1148. Epub 2015/11/21. doi: 10.1186/s12889-015-2449-z 10.1186/s12889-015-2449-z [pii].

- 1  
2  
3 10. Rongen A, Robroek SJ, van der Heijden BI, et al. Influence of work-related characteristics and  
4  
5 2 work ability on changing employer or leaving the profession among nursing staff. *J Nurs Manag.*  
6  
7 3 2014;22(8):1065-75. Epub 2013/08/15. doi: 10.1111/jonm.12066.  
8  
9 4 11. Tuomi K, Ilmarinen J, Jahkola A, et al. Work ability index. Helsinki: Finnish Institute of  
10  
11 5 Occupational Health, 1998.  
12  
13 6 12. Ahlstrom L, Grimby-Ekman A, Hagberg M, et al. The work ability index and single-item  
14  
15 7 question: associations with sick leave, symptoms, and health--a prospective study of women on long-  
16  
17 8 term sick leave. *Scand J Work Environ Health.* 2010;36(5):404-12. Epub 2010/04/08.  
18  
19 9 13. Lundin A, Leijon O, Vaez M, et al. Predictive validity of the Work Ability Index and its  
20  
21 10 individual items in the general population. *Scand J Public Health.* 2017;45(4):350-6. Epub  
22  
23 11 2017/04/08. doi: 10.1177/1403494817702759.  
24  
25 12 14. Nordstoga AL, Vasseljen O, Meisingset I, et al. Improvement in Work Ability, Psychological  
26  
27 13 Distress and Pain Sites in Relation to Low Back Pain Prognosis: A Longitudinal Observational Study  
28  
29 14 in Primary Care. *Spine (Phila Pa 1976).* 2019;44(7):E423-E9. doi: 10.1097/BRS.0000000000002860.  
30  
31 15 15. Parthasarathy S, Vasquez MM, Halonen M, et al. Persistent insomnia is associated with mortality  
32  
33 16 risk. *Am J Med.* 2015;128(3):268-75 e2. doi: 10.1016/j.amjmed.2014.10.015.  
34  
35 17 16. Nieters A, Blagitko-Dorfs N, Peter HH, et al. Psychophysiological insomnia and respiratory tract  
36  
37 18 infections: results of an infection-diary-based cohort study. *Sleep.* 2019. doi: 10.1093/sleep/zsz098.  
38  
39 19 17. Dong Y, Yang FM. Insomnia symptoms predict both future hypertension and depression. *Prev*  
40  
41 20 *Med.* 2019;123:41-7. doi: 10.1016/j.ypmed.2019.02.001. PubMed PMID: 30742871.  
42  
43 21 18. Canivet C, Ostergren PO, Choi B, et al. Sleeping problems as a risk factor for subsequent  
44  
45 22 musculoskeletal pain and the role of job strain: results from a one-year follow-up of the Malmo  
46  
47 23 Shoulder Neck Study Cohort. *Int J Behav Med.* 2008;15(4):254-62. doi:  
48  
49 24 10.1080/10705500802365466.  
50  
51 25 19. Kovacs FM, Seco J, Royuela A, et al. Patients with neck pain are less likely to improve if they  
52  
53 26 experience poor sleep quality: a prospective study in routine practice. *Clin J Pain.* 2015;31(8):713-21.  
54  
55 27 doi: 10.1097/AJP.000000000000147.  
56  
57  
58  
59  
60

- 1  
2  
3 1 20. Paanalahti K, Wertli MM, Held U, et al. Spinal pain--good sleep matters: a secondary analysis of  
4  
5 2 a randomized controlled trial. *Eur Spine J*. 2016;25(3):760-5. doi: 10.1007/s00586-015-3987-x.  
6  
7 3 21. Aili K, Nyman T, Hillert L, et al. Sleep disturbances predict future sickness absence among  
8  
9 4 individuals with lower back or neck-shoulder pain: a 5-year prospective study. *Scand J Public Health*.  
10  
11 5 2015;43(3):315-23. doi: 10.1177/1403494814567755.  
12  
13 6 22. Rasmussen-Barr E, Grooten WJ, Hallqvist J, et al. Are job strain and sleep disturbances prognostic  
14  
15 7 factors for neck/shoulder/arm pain? A cohort study of a general population of working age in Sweden.  
16  
17 8 *BMJ Open*. 2014;4(7):e005103. doi: 10.1136/bmjopen-2014-005103.  
18  
19 9 23. Rasmussen-Barr E, Grooten WJA, Hallqvist J, et al. Are job strain and sleep disturbances  
20  
21 10 prognostic factors for low-back pain? A cohort study of a general population of working age in  
22  
23 11 Sweden. *J Rehabil Med*. 2017;49(7):591-7. doi: 10.2340/16501977-2249.  
24  
25 12 24. Palmlof L, Holm LW, Alfredsson L, et al. The impact of work related physical activity and leisure  
26  
27 13 physical activity on the risk and prognosis of neck pain - a population based cohort study on workers.  
28  
29 14 *BMC Musculoskelet Disord*. 2016;17:219. doi: 10.1186/s12891-016-1080-1.  
30  
31 15 25. de Zwart BC, Frings-Dresen MH, van Duivenbooden JC. Test-retest reliability of the Work  
32  
33 16 Ability Index questionnaire. *Occup Med (Lond)*. 2002;52(4):177-81. Epub 2002/07/02.  
34  
35 17 26. Radkiewich P W-BM, editor Psychometric Properties of Work Ability Index in the Light of  
36  
37 18 Comparative Survey Study. 2nd International Symposium on Work Ability; 2004; Verona, Italy:  
38  
39 19 Elsevier; 2005.  
40  
41 20 27. Goldberg DP, Gater R, Sartorius N, et al. The validity of two versions of the GHQ in the WHO  
42  
43 21 study of mental illness in general health care. *Psychol Med*. 1997;27(1):191-7.  
44  
45 22 28. Lundin A, Hallgren M, Theobald H, et al. Validity of the 12-item version of the General Health  
46  
47 23 Questionnaire in detecting depression in the general population. *Public Health*. 2016;136:66-74. doi:  
48  
49 24 10.1016/j.puhe.2016.03.005.  
50  
51 25 29. Andersson T, Alfredsson L, Kallberg H, et al. Calculating measures of biological interaction. *Eur*  
52  
53 26 *J Epidemiol*. 2005;20(7):575-9.  
54  
55  
56  
57  
58  
59  
60

- 1  
2  
3 1 30. Alavinia SM, van den Berg TI, van Duivenbooden C, et al. Impact of work-related factors,  
4  
5 2 lifestyle, and work ability on sickness absence among Dutch construction workers. *Scand J Work*  
6  
7 3 *Environ Health*. 2009;35(5):325-33.  
8  
9 4 31. Jaaskelainen A, Kausto J, Seitsamo J, et al. Work ability index and perceived work ability as  
10  
11 5 predictors of disability pension: a prospective study among Finnish municipal employees. *Scand J*  
12  
13 6 *Work Environ Health*. 2016. Epub 2016/10/06. doi: 10.5271/sjweh.3598 3598 [pii].  
14  
15  
16 7 32. Yabe Y, Hagiwara Y, Sekiguchi T, et al. Sleep Disturbance Is Associated with New Onset and  
17  
18 8 Continuation of Lower Back Pain: A Longitudinal Study among Survivors of the Great East Japan  
19  
20 9 Earthquake. *Tohoku J Exp Med*. 2018;246(1):9-14. doi: 10.1620/tjem.246.9.  
21  
22  
23 10 33. Gustafsson ML, Laaksonen C, Aromaa M, et al. The prevalence of neck-shoulder pain, back pain  
24  
25 11 and psychological symptoms in association with daytime sleepiness - a prospective follow-up study of  
26  
27 12 school children aged 10 to 15. *Scand J Pain*. 2018;18(3):389-97. doi: 10.1515/sjpain-2017-0166.  
28  
29 13 34. Sawada T, Matsudaira K, Muto Y, et al. Potential risk factors for onset of severe neck and  
30  
31 14 shoulder discomfort (Katakori) in urban Japanese workers. *Ind Health*. 2016;54(3):230-6. doi:  
32  
33 15 10.2486/indhealth.2015-0143.  
34  
35 16 35. Nitter AK, Pripp AH, Forseth KO. Are sleep problems and non-specific health complaints risk  
36  
37 17 factors for chronic pain? A prospective population-based study with 17 year follow-up. *Scand J Pain*.  
38  
39 18 2012;3(4):210-7. doi: 10.1016/j.sjpain.2012.04.001.  
40  
41  
42 19 36. Generaal E, Vogelzangs N, Penninx BW, et al. Insomnia, Sleep Duration, Depressive Symptoms,  
43  
44 20 and the Onset of Chronic Multisite Musculoskeletal Pain. *Sleep*. 2017;40(1). doi:  
45  
46 21 10.1093/sleep/zsw030.  
47  
48 22 37. Haack M, Sanchez E, Mullington JM. Elevated inflammatory markers in response to prolonged  
49  
50 23 sleep restriction are associated with increased pain experience in healthy volunteers. *Sleep*.  
51  
52 24 2007;30(9):1145-52.  
53  
54 25 38. Koffel EA, Koffel JB, Gehrman PR. A meta-analysis of group cognitive behavioral therapy for  
55  
56 26 insomnia. *Sleep Med Rev*. 2015;19:6-16. doi: 10.1016/j.smr.2014.05.001.  
57  
58  
59  
60

- 1  
2  
3 1 39. Ye YY, Zhang YF, Chen J, et al. Internet-Based Cognitive Behavioral Therapy for Insomnia  
4  
5 2 (ICBT-i) Improves Comorbid Anxiety and Depression-A Meta-Analysis of Randomized Controlled  
6  
7 3 Trials. *PLoS One*. 2015;10(11):e0142258. doi: 10.1371/journal.pone.0142258.  
8  
9  
10  
11  
12  
13  
14  
15  
16  
17  
18  
19  
20  
21  
22  
23  
24  
25  
26  
27  
28  
29  
30  
31  
32  
33  
34  
35  
36  
37  
38  
39  
40  
41  
42  
43  
44  
45  
46  
47  
48  
49  
50  
51  
52  
53  
54  
55  
56  
57  
58  
59  
60

For peer review only

1  
2  
3  
4  
5 Figure 1. Flowchart of the inclusion of the study population and follow up.  
6

7 \* NBP; neck and/or back pain.  
8  
9  
10  
11  
12  
13  
14  
15  
16  
17  
18  
19  
20  
21  
22  
23  
24  
25  
26  
27  
28  
29  
30  
31  
32  
33  
34  
35  
36  
37  
38  
39  
40  
41  
42  
43  
44  
45  
46  
47  
48  
49  
50  
51  
52  
53  
54  
55  
56  
57  
58  
59  
60

For peer review only



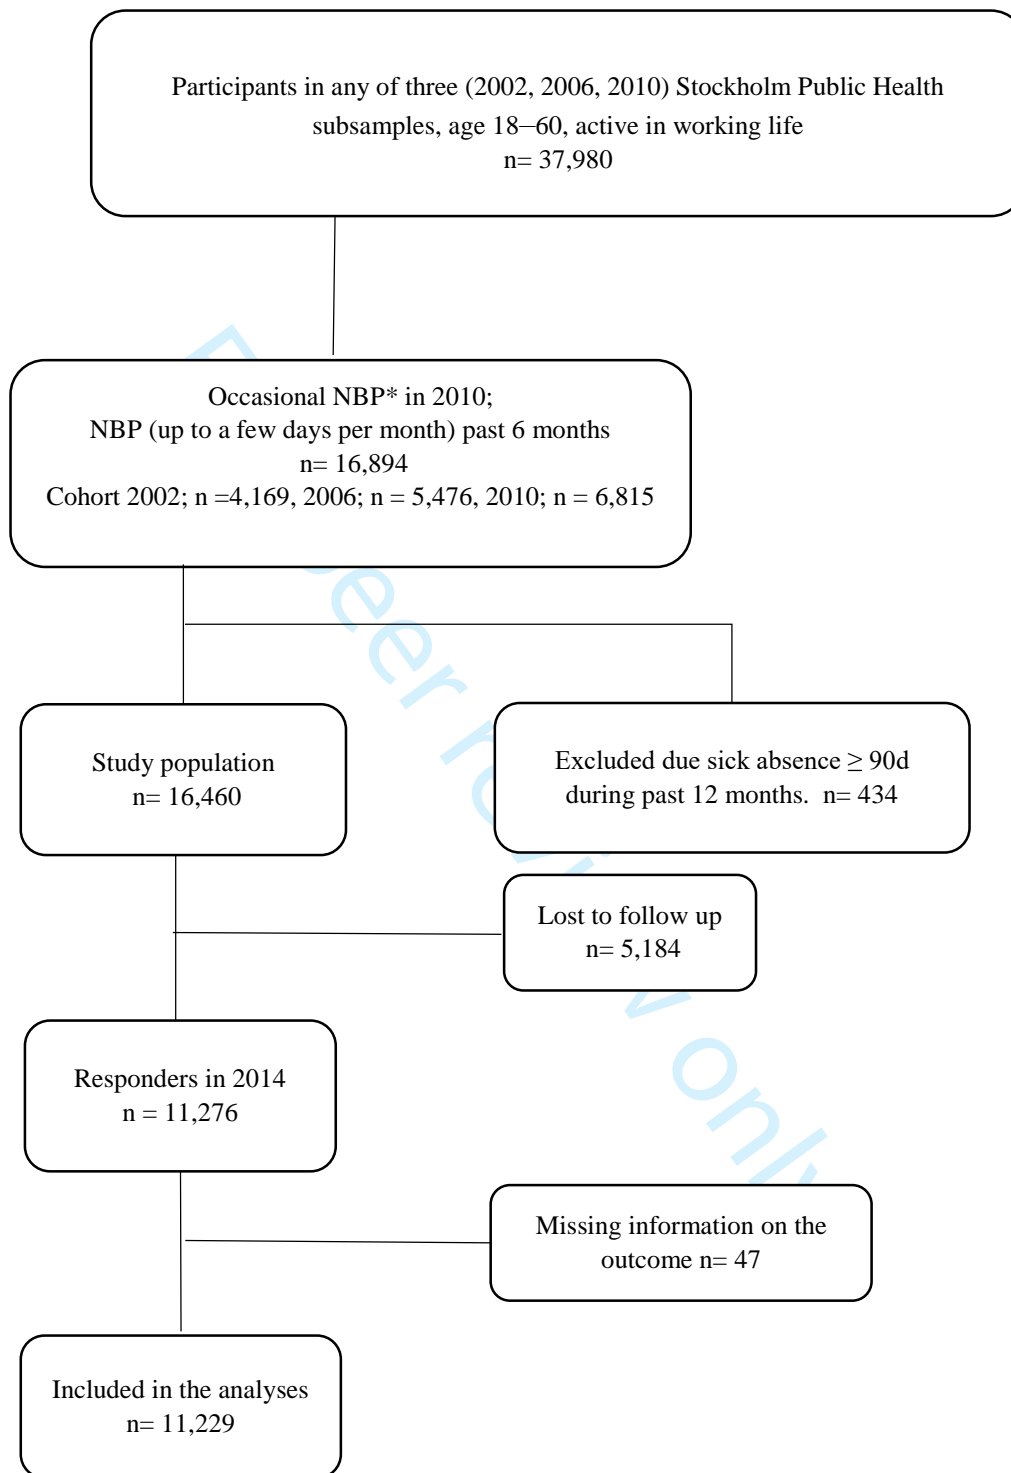

STROBE Statement—Checklist of items that should be included in reports of *cohort studies*

|                              | Item No | Recommendation                                                                                                                                                                       | Considered                                                              |
|------------------------------|---------|--------------------------------------------------------------------------------------------------------------------------------------------------------------------------------------|-------------------------------------------------------------------------|
| Title and abstract           | 1       | (a) Indicate the study's design with a commonly used term in the title or the abstract                                                                                               | yes                                                                     |
|                              |         | (b) Provide in the abstract an informative and balanced summary of what was done and what was found                                                                                  | yes                                                                     |
| <b>Introduction</b>          |         |                                                                                                                                                                                      |                                                                         |
| Background/rationale         | 2       | Explain the scientific background and rationale for the investigation being reported                                                                                                 | Yes pp 5; lines 3 – 8, 14-18<br>Pp 7 lines 3-6                          |
| Objectives                   | 3       | State specific objectives, including any prespecified hypotheses                                                                                                                     | Yes pp 7 lines 6-9                                                      |
| <b>Methods</b>               |         |                                                                                                                                                                                      |                                                                         |
| Study design                 | 4       | Present key elements of study design early in the paper                                                                                                                              | Yes pp 8<br>Lines 3-4                                                   |
| Setting                      | 5       | Describe the setting, locations, and relevant dates, including periods of recruitment, exposure, follow-up, and data collection                                                      | Yes<br>Pp 8 , lines 3-24, pp9 lines 1-13                                |
| Participants                 | 6       | (a) Give the eligibility criteria, and the sources and methods of selection of participants. Describe methods of follow-up                                                           | Yes pp 8, lines 9-18<br>Pp 9 lines 15-17                                |
|                              |         | (b) For matched studies, give matching criteria and number of exposed and unexposed                                                                                                  | NA                                                                      |
| Variables                    | 7       | Clearly define all outcomes, exposures, predictors, potential confounders, and effect modifiers. Give diagnostic criteria, if applicable                                             | Yes<br>Pp 8 lines 19-24 pp -9, lines 1-22                               |
| Data sources/<br>measurement | 8*      | For each variable of interest, give sources of data and details of methods of assessment (measurement). Describe comparability of assessment methods if there is more than one group | Yes<br>Table 1 + pp 8-9                                                 |
| Bias                         | 9       | Describe any efforts to address potential sources of bias                                                                                                                            | Yes<br>Pp 25 Lines 7-23                                                 |
| Study size                   | 10      | Explain how the study size was arrived at                                                                                                                                            | Yes Figure 1                                                            |
| Quantitative variables       | 11      | Explain how quantitative variables were handled in the analyses. If applicable, describe which groupings were chosen and why                                                         | Yes<br>Table 1<br>Pp 8 Lines 20-24, pp 9, lines 1-13, pp 12- Lines 9-12 |
| Statistical methods          | 12      | (a) Describe all statistical methods, including those used to control for confounding                                                                                                | Yes pp 9, lines 18-22, pp 11, lines 3-24                                |
|                              |         | (b) Describe any methods used to examine subgroups and interactions                                                                                                                  | Yes pp 12<br>lines 9- 13                                                |
|                              |         | (c) Explain how missing data were addressed                                                                                                                                          | Yes table 2                                                             |

|                          |     |                                                                                                                                                                                                              |                                             |
|--------------------------|-----|--------------------------------------------------------------------------------------------------------------------------------------------------------------------------------------------------------------|---------------------------------------------|
|                          |     | (d) If applicable, explain how loss to follow-up was addressed                                                                                                                                               | Yes pp 12 .<br>lines 20-23                  |
|                          |     | (e) Describe any sensitivity analyses                                                                                                                                                                        | NA                                          |
| <b>Results</b>           |     |                                                                                                                                                                                                              |                                             |
| Participants             | 13* | (a) Report numbers of individuals at each stage of study—eg numbers potentially eligible, examined for eligibility, confirmed eligible, included in the study, completing follow-up, and analysed            | Yes Figure 1                                |
|                          |     | (b) Give reasons for non-participation at each stage                                                                                                                                                         | NA                                          |
|                          |     | (c) Consider use of a flow diagram                                                                                                                                                                           | Yes Figure 1                                |
| Descriptive data         | 14* | (a) Give characteristics of study participants (eg demographic, clinical, social) and information on exposures and potential confounders                                                                     | Yes Table 2<br>Table 1                      |
|                          |     | (b) Indicate number of participants with missing data for each variable of interest                                                                                                                          | Yes<br>Table 2                              |
|                          |     | (c) Summarise follow-up time (eg, average and total amount)                                                                                                                                                  | Yes 4 years<br>pp 8 lines 6-7               |
| Outcome data             | 15* | Report numbers of outcome events or summary measures over time                                                                                                                                               | Yes<br>Pp 15 line 2                         |
| Main results             | 16  | (a) Give unadjusted estimates and, if applicable, confounder-adjusted estimates and their precision (eg, 95% confidence interval). Make clear which confounders were adjusted for and why they were included | Yes<br>Pp 15 lines 6-14 -Tables 3 a and 3 b |
|                          |     | (b) Report category boundaries when continuous variables were categorized                                                                                                                                    | Yes<br>Table 1 and 2                        |
|                          |     | (c) If relevant, consider translating estimates of relative risk into absolute risk for a meaningful time period                                                                                             |                                             |
| Other analyses           | 17  | Report other analyses done—eg analyses of subgroups and interactions, and sensitivity analyses                                                                                                               | Yes tab4 4<br>and pp 21<br>lines 2-7        |
| <b>Discussion</b>        |     |                                                                                                                                                                                                              |                                             |
| Key results              | 18  | Summarise key results with reference to study objectives                                                                                                                                                     | Yes pp 23.<br>Lines 3-7                     |
| Limitations              | 19  | Discuss limitations of the study, taking into account sources of potential bias or imprecision. Discuss both direction and magnitude of any potential bias                                                   | Yes<br>Pp 25 lines 7-23                     |
| Interpretation           | 20  | Give a cautious overall interpretation of results considering objectives, limitations, multiplicity of analyses, results from similar studies, and other relevant evidence                                   | Yes pp 26<br>lines 6-10                     |
| Generalisability         | 21  | Discuss the generalisability (external validity) of the study results                                                                                                                                        | yes Yes pp 26<br>lines 1-5                  |
| <b>Other information</b> |     |                                                                                                                                                                                                              |                                             |
| Funding                  | 22  | Give the source of funding and the role of the funders for the present study and, if applicable, for the original study on which the present article is based                                                | Yes pp 25,<br>lines 22-23                   |

\*Give information separately for exposed and unexposed groups.

1 **Note:** An Explanation and Elaboration article discusses each checklist item and gives methodological background and  
2 published examples of transparent reporting. The STROBE checklist is best used in conjunction with this article (freely  
3 available on the Web sites of PLoS Medicine at <http://www.plosmedicine.org/>, Annals of Internal Medicine at  
4 <http://www.annals.org/>, and Epidemiology at <http://www.epidem.com/>). Information on the STROBE Initiative is  
5 available at <http://www.strobe-statement.org>.  
6  
7  
8  
9  
10  
11  
12  
13  
14  
15  
16  
17  
18  
19  
20  
21  
22  
23  
24  
25  
26  
27  
28  
29  
30  
31  
32  
33  
34  
35  
36  
37  
38  
39  
40  
41  
42  
43  
44  
45  
46  
47  
48  
49  
50  
51  
52  
53  
54  
55  
56  
57  
58  
59  
60

For peer review only

# BMJ Open

## **Risk of transition from occasional neck/back pain to long-duration activity limiting neck/back pain: A cohort study on the influence of poor work ability and sleep disturbances in the working population in Stockholm County**

|                                 |                                                                                                                                                                                                                                                                                                                                                                                                                                                               |
|---------------------------------|---------------------------------------------------------------------------------------------------------------------------------------------------------------------------------------------------------------------------------------------------------------------------------------------------------------------------------------------------------------------------------------------------------------------------------------------------------------|
| Journal:                        | <i>BMJ Open</i>                                                                                                                                                                                                                                                                                                                                                                                                                                               |
| Manuscript ID                   | bmjopen-2019-033946.R2                                                                                                                                                                                                                                                                                                                                                                                                                                        |
| Article Type:                   | Original research                                                                                                                                                                                                                                                                                                                                                                                                                                             |
| Date Submitted by the Author:   | 12-Mar-2020                                                                                                                                                                                                                                                                                                                                                                                                                                                   |
| Complete List of Authors:       | Holm, Lena; Karolinska institutet, Institute of Environmental medicine<br>Bohman, Tony; Karolinska Institutet, Institute of Environmental Medicine<br>Lekander, Mats; Stress Research Institute, Stockholm University;<br>Karolinska Institutet, Clinical Neuroscience<br>Magnusson, C; Karolinska Institutet, Department of Public Health Sciences<br>Skillgate, Eva; Karolinska institutet, Institute of Environmental medicine;<br>Sophiahemmet University |
| <b>Primary Subject Heading</b>: | Epidemiology                                                                                                                                                                                                                                                                                                                                                                                                                                                  |
| Secondary Subject Heading:      | Public health                                                                                                                                                                                                                                                                                                                                                                                                                                                 |
| Keywords:                       | EPIDEMIOLOGY, OCCUPATIONAL & INDUSTRIAL MEDICINE, Musculoskeletal disorders < ORTHOPAEDIC & TRAUMA SURGERY                                                                                                                                                                                                                                                                                                                                                    |
|                                 |                                                                                                                                                                                                                                                                                                                                                                                                                                                               |

SCHOLARONE™  
Manuscripts



I, the Submitting Author has the right to grant and does grant on behalf of all authors of the Work (as defined in the below author licence), an exclusive licence and/or a non-exclusive licence for contributions from authors who are: i) UK Crown employees; ii) where BMJ has agreed a CC-BY licence shall apply, and/or iii) in accordance with the terms applicable for US Federal Government officers or employees acting as part of their official duties; on a worldwide, perpetual, irrevocable, royalty-free basis to BMJ Publishing Group Ltd ("BMJ") its licensees and where the relevant Journal is co-owned by BMJ to the co-owners of the Journal, to publish the Work in this journal and any other BMJ products and to exploit all rights, as set out in our [licence](#).

The Submitting Author accepts and understands that any supply made under these terms is made by BMJ to the Submitting Author unless you are acting as an employee on behalf of your employer or a postgraduate student of an affiliated institution which is paying any applicable article publishing charge ("APC") for Open Access articles. Where the Submitting Author wishes to make the Work available on an Open Access basis (and intends to pay the relevant APC), the terms of reuse of such Open Access shall be governed by a Creative Commons licence – details of these licences and which [Creative Commons](#) licence will apply to this Work are set out in our licence referred to above.

Other than as permitted in any relevant BMJ Author's Self Archiving Policies, I confirm this Work has not been accepted for publication elsewhere, is not being considered for publication elsewhere and does not duplicate material already published. I confirm all authors consent to publication of this Work and authorise the granting of this licence.

1  
2  
3  
4 1  
5  
6  
7 2 Risk of transition from occasional neck/back pain to long-duration activity  
8  
9  
10 3 limiting neck/back pain: A cohort study on the influence of poor work ability  
11  
12  
13 4 and sleep disturbances in the working population in Stockholm County  
14  
15

16 5  
17  
18 6 Corresponding author: Lena W Holm, Institute of Environmental Medicine, Karolinska Institutet, Box  
19 7 2010, 171 77 STOCKHOLM, Sweden

20  
21 8 [Lena.Holm@ki.se](mailto:Lena.Holm@ki.se)

22  
23 9 Phone

24 10 + 46 704 827479  
25  
26  
27

28 12 Co-authors in order:

29  
30 13 Tony Bohman, Institute of Environmental Medicine, Karolinska Institutet, Stockholm,  
31  
32 14 Sweden

33  
34 15 Mats Lekander, Stress Research Institute, Stockholm University, Sweden

35  
36  
37 16 Cecilia Magnusson, Department of Clinical Neuroscience, Karolinska Institutet, Stockholm,  
38  
39 17 Sweden

40  
41 18 Eva Skillgate, Sophiahemmet University, Stockholm, Sweden  
42  
43  
44  
45  
46  
47

48 21 Word count: 3,158  
49  
50  
51  
52  
53  
54  
55  
56  
57  
58  
59  
60

## ABSTRACT

**Objectives:** The prevalence of neck/back pain (NBP) is high worldwide. Limited number of studies have investigated workers with occasional NBP regarding the risk of developing long-duration activity limiting NBP (LNBP). The objectives were to assess (1) the effect of poor work ability and sleep disturbances in persons with occasional NBP on the risk of LNBP, (2) the interaction effect of these exposures.

**Design:** Cohort study based on three subsamples from the Stockholm Public Health Cohort.

**Settings:** The working population in Stockholm County.

**Participants:** Persons aged 18–60, reporting occasional NBP the past 6 months at baseline year 2010 (n=16,460).

**Measures:** Work ability was assessed with items from the Work Ability Index, perceived mental and/or physical work ability. Sleep disturbances were self-reported current mild/severe disturbances. The outcome in year 2014; reporting NBP the previous 6 months, occurring  $\geq$  couple of days per week and resulting in decreased work ability/restricted other daily activities. The additive effect of having both poor work ability and sleep disturbances was modelled with a dummy variable, including both exposures. Poisson log linear regression was used to calculate risk ratios (RR) and 95% confidence intervals (95% CI).

**Results:** At follow up, 9% had developed LNBP. Poor work ability and sleep disturbances were independent risk factors for LNBP; adjusted RR 1.7;(95%CI:1.4-2.0) and 1.4;(95%CI:1.2-1.5) respectively. No additive interaction was observed.

**Conclusion:** Workers with occasional NBP who have poor work ability and/or sleep disturbances are at risk of developing long-duration activity limiting NBP. Having both conditions does not exceed additive risk.



1  
2  
3 **1 ARTICLE SUMMARY**  
4  
5

6 **2 Strengths and limitations of this study**  
7  
8

- 9 • A longitudinal design and the exposures were measured at baseline and the outcome  
10 at follow-up four years later, thus the temporality has been taken care of.  
11  
12  
13  
14 • Large study population securing statistical power.  
15  
16 • A comprehensive control of confounding factors increases the possibility of causality.  
17  
18  
19 • The main possible limitation is the misclassification of the exposures and the outcome  
20 and would, if any, result in an underestimation of the results.  
21  
22  
23  
24  
25  
26  
27  
28  
29  
30  
31  
32  
33  
34  
35  
36  
37  
38  
39  
40  
41  
42  
43  
44  
45  
46  
47  
48  
49  
50  
51  
52  
53  
54  
55  
56  
57  
58  
59  
60

## 1 INTRODUCTION

2  
3  
4  
5  
6  
7  
8  
9  
10  
11  
12  
13  
14  
15  
16  
17  
18  
19  
20  
21  
22  
23  
24  
25  
26  
27  
28  
29  
30  
31  
32  
33  
34  
35  
36  
37  
38  
39  
40  
41  
42  
43  
44  
45  
46  
47  
48  
49  
50  
51  
52  
53  
54  
55  
56  
57  
58  
59  
60

1  
2  
3  
4  
5  
6  
7  
8  
9  
10  
11  
12  
13  
14  
15  
16  
17  
18  
19  
20  
21  
22  
23  
24  
25  
26  
27  
28  
29  
30  
31  
32  
33  
34  
35  
36  
37  
38  
39  
40  
41  
42  
43  
44  
45  
46  
47  
48  
49  
50  
51  
52  
53  
54  
55  
56  
57  
58  
59  
60

Despite decades of research aiming to understand how to prevent and treat long-duration activity limiting neck and/or back pain (LNBP), these health conditions seem to increase over time and are the leading causes of disability globally[1, 2]. Preventive measures are necessary in order to reduce the burden of disease in society and require a knowledge of modifiable risk factors. A recent systemic review of risk factors for the onset of “first episode” neck pain concludes that personal as well as work-related factors play a role in the development of neck pain, some of which are modifiable while others are not [3]. Another systematic review concludes that physical activity may reduce the risk of long-duration low back pain, [4] while the evidence of risk factors for recurrence of low back pain,[5] and neck pain,[6] is sparse. Most people experience recurrent occasional short duration NBP, and it is necessary to identify the factors involved in the transition to long-duration and activity limiting pain conditions in order to address these in prevention measures.

Self-perceived work ability is a concept which has been widely studied in occupational settings, often as a predictor of future sickness absence,[7, 8], but it has also been shown to be associated with outcomes such as health-related production loss,[9] and work turnover [10]. A frequently used measurement is the Work Ability Index (WAI) and its subscales. WAI consists of seven items including two about perceived work ability in relation to physical and mental work demands[11]. Ahlstrom et al.,[12] used both the full WAI and the single item WAI-S; “current work ability compared with the lifetime best”, and found that both were associated with sickness absenteeism over a 12-month period . Lundin et al. found that this single WAI item had an excellent ability to predict long-term sickness absence, and also that the two items covering perceived mental and physical work ability had acceptable predictive validity [13].

1 Little is known about the impact of perceived work ability on the development of NBP. A  
2 recent clinical study of primary care patients with low back pain found an association  
3 between higher work ability measured with the WAI item “current work ability compared  
4 with the lifetime best” and improvement in work ability, pain and quality of life at follow  
5 up[14], but other than this, the topic appears to have escaped scientific investigation despite  
6 the construct’s connection to future ill-health.

7 It is well-established that impaired sleep increases the risk of several health problems of  
8 varying severity, for instance all-cause cardiopulmonary mortality, respiratory tract  
9 infections, hypertension as well as depression[15-17]. Current evidence suggests that sleep  
10 disturbances are a risk factor for the onset of NBP [18], as well as a prognostic factor in  
11 subacute or long-lasting pain conditions,[19, 20], and for sickness absence[21].

12 Hypothesizing that poor work ability and sleep disturbances are independent risk factors for  
13 the development of LNBP, it is possible that having both factors results in a synergistic  
14 effect.

15 Few studies have focused on workers with occasional NBP and their risk of LNBP. We have  
16 previously studied job strain and sleep disturbances,[22, 23] regarding the risk of LNBP and  
17 have found that high job strain (high job demands/low job control) and active jobs (high job  
18 demands/high job control) as well as sleep disturbances were independent risk factors, but the  
19 estimates were modest for both conditions. The results also indicated that sleep disturbances  
20 may modify the association between high job strain and long-duration activity limiting neck  
21 pain, [22], but this was not the case for back pain[23]. In another study, also based on  
22 workers with occasional neck pain, work-related and leisure time physical activity were  
23 assessed for the risk of long-duration activity limiting neck pain, but no associations were  
24 found[24].

1  
2  
3 1 In summary, there is some evidence that poor perceived work ability and sleep disturbances  
4  
5 2 contribute both to the onset of and the recovery from pain conditions, however little is  
6  
7 3 known about the transitions from occasional pain to long-duration pain that affects daily  
8  
9 4 activities, including the spectra from minor restrictions to full work disability. The primary  
10  
11 5 aim of this study was to assess the effect of poor mental and/or poor physical work ability  
12  
13 6 and sleep disturbances, respectively, in persons with occasional NBP, for the risk of  
14  
15 7 developing LNBP. A secondary aim was to assess the additive interaction effect between  
16  
17 8 these two exposures.  
18  
19  
20  
21  
22  
23  
24  
25  
26  
27  
28  
29  
30  
31  
32  
33  
34  
35  
36  
37  
38  
39  
40  
41  
42  
43  
44  
45  
46  
47  
48  
49  
50  
51  
52  
53  
54  
55  
56  
57  
58  
59  
60

For peer review only

## 1 MATERIAL AND METHODS

### 2 Design, source and study population

3 A prospective cohort was formed based on three subsamples of the Stockholm Public Health  
4 Cohort; one recruited in year 2002 and followed up in year 2006, 2010 and 2014, one formed  
5 in 2006 and followed up in 2010 and 2014, and a third formed in 2010 and followed up in  
6 2014. We used the 2010 and 2014 waves as baseline and follow-up, respectively, in all  
7 subsamples. The data used (i.e. the questions) were defined in the same way in these  
8 subsamples in 2010 and 2014.

9 Men and women, aged 18–60 who were participating in any of the three subsamples in 2010  
10 were included if they reported NBP during the past six months up to a couple of days per  
11 month but not more often, and were responding to any of two items from the WAI); physical  
12 and mental capacity in relation to work demands (indicating that the persons were active in  
13 working life) at baseline. NBP was defined based on the questions: “Have you had any pain  
14 in your upper back or neck in the preceding 6 months?”, and “Have you had any pain in your  
15 lower back in the preceding 6 months?”. Persons who responded “Yes, a couple of days per  
16 month or less frequent” to one or both of these questions fulfilled the criteria for NBP.  
17 Persons with sickness absence of more than 90 days during the past 12 months were  
18 excluded.

### 19 Exposures

20 The exposure self-perceived physical work ability and mental work ability in relation to work  
21 demands was measured with two questions from the WAI. The psychometric properties of  
22 this instrument have been tested,[25, 26], and it is considered stable at a group level,  
23 predictive and internally coherent. Physical work ability was measured with the question:  
24 “How do you rate your current work ability with respect to the physical demands of your

1 work?" The answering alternatives were: "Very good", "Good", "Moderate", "Rather poor",  
2 and "Poor". The variable was dichotomised into poor work ability ("Moderate", "Rather  
3 poor" or "Poor"), and good work ability ("Very good" or "Rather good"). Mental work  
4 ability was measured with the question: "How do you rate your current work ability with  
5 respect to the psychological and mental demands of your work?" The alternative response  
6 for mental work ability were the same as for physical work ability and the variable was  
7 dichotomised in the same way. The two items were then merged into "poor work ability"  
8 ("Moderate", "Rather poor", "Poor" in one or both of the items), whereas those scoring  
9 "Good" or "Very good" on both items, were categorised as having "Good work ability" (non-  
10 exposed).

11 The exposure sleep disturbances were defined as having responded "Yes mild" or "Yes  
12 severe" to the question "Do you have sleep disturbances?". Those responding "No" were  
13 classified as unexposed.

#### 14 **Outcome**

15 The outcome LNBP was operationalised by the response from the 2014 questionnaire and  
16 was defined as having reported NBP during the past 6 months, occurring a couple of days per  
17 week or more often, and resulting in a decreased work ability/restricted other daily activity.

#### 18 **Confounding control**

19 We investigated several potential confounders, based on relevance and on the literature on  
20 risk factors for long lasting NBP (table 1). For the work ability exposure, one model was run,  
21 adding sleep disturbances as a confounder, and similarly for the model sleep disturbances,  
22 one model was run adding work ability as a confounder.

23

1 Table 1. Description of the variables, tested as potential confounders

| Variables                       | Operationalisation <sup>1</sup>                                                                                                                                                                                                                                |
|---------------------------------|----------------------------------------------------------------------------------------------------------------------------------------------------------------------------------------------------------------------------------------------------------------|
| Age                             | Continuous and categorised in 5-year intervals                                                                                                                                                                                                                 |
| Sex                             | Man/Woman                                                                                                                                                                                                                                                      |
| Socioeconomic Status            | Based on occupational class, classified according to the Swedish socioeconomic classification, developed by Statistics Sweden and retrieved from National Register in Sweden: A combination of current occupation and highest educational level (6 categories) |
| Body Mass Index                 | Continuous and categorised into Underweight <18.5, Normal weight 18.5–24.9, Overweight 25–29.9, Obese $\geq 30$                                                                                                                                                |
| Daily Smoking                   | Question: “Are you currently smoking daily or almost daily” Response alternatives: “Yes,” “No”                                                                                                                                                                 |
| Sedentary Leisure Time Activity | “State your average physical activity during the past 12 months”; Leisure time sitting; watching, TV, reading. The response alternatives were added up and categorised into <2 hrs/day, 2-3 hrs/day, and more than 3 hrs/day                                   |
| Physical Activity               | “State your physical activity (PA) during the past 12 months” categorised into Walking/cycling less than 20 min/day AND other leisure time PA less than 1 hr/week vs PA (walking/biking, other PA) exceeding these time durations                              |

---

|                        |                                                                                                                                                                                       |
|------------------------|---------------------------------------------------------------------------------------------------------------------------------------------------------------------------------------|
| Household Composition  | Three categories; adult living alone, adult living with other adult(s) with/without children, adult living with children                                                              |
| Psychological Distress | Derived from the General Health Questionnaire (GHQ12) [27, 28] and categorized into < 3, 3–7 and > 7.                                                                                 |
| Long-standing illness  | The question “Do you have any long-duration sickness, health problems as a result of an accident, handicap or other long-duration health problem?” Response alternatives: “Yes “,”No” |

---

<sup>1</sup> All variables were retrieved from the baseline questionnaire except Socioeconomic Status, which is retrieved from National Swedish Registers



1

## 2 **Statistical Methods**

3 Generalized Linear models with Poisson log linear regression was used to estimate the  
4 association between the exposures and the outcome. The results are presented as a risk ratio  
5 (RR) with 95% confidence intervals (CI). We ran four adjusted models. For work ability, the  
6 first model excluding and the second including sleep disturbances, and for sleep disturbances,  
7 one model excluding and the second including work ability. This was done since it might be  
8 argued that these factors act as mediators rather than confounders.

9 To assess whether the interaction between the two risk factors poor work ability and sleep  
10 disturbances deviated from additivity regarding the risk of developing LNBP, we created a  
11 dummy variable: having poor work ability/no sleep disturbances, no poor work ability/sleep  
12 disturbances, both poor work ability and sleep disturbances[29]. Having none of the  
13 conditions served as a reference, and this model was run in a Poisson log linear regression.

14 Factors potentially confounding the effect between the exposures and the outcome were  
15 added one at the time to each univariate model. If the crude estimate changed by 5% or more,  
16 the factor was considered a confounder and was included in the adjusted model. We also  
17 added a variable including the origin of the three subsamples, since, for two of the merged  
18 subsamples, the first and second follow-up wave respectively were used as baseline in our  
19 study.

20 To assess the potential selection bias, attrition analysis was conducted by comparing the  
21 prevalence of the main exposure, work ability, among those lost to follow-up and those with  
22 missing data on any of the outcome variables, with the prevalence of this exposure among  
23 those successfully followed.

24 IBM® SPSS Statistics version 25 was used.

1  
2  
3  
4  
5  
6  
7  
8  
9  
10  
11  
12  
13  
14  
15  
16  
17  
18  
19  
20  
21  
22  
23  
24  
25  
26  
27  
28  
29  
30  
31  
32  
33  
34  
35  
36  
37  
38  
39  
40  
41  
42  
43  
44  
45  
46  
47  
48  
49  
50  
51  
52  
53  
54  
55  
56  
57  
58  
59  
60

1 **Patient and Public Involvement**

2 Patients or the public were not involved in the design or planning of the study.

For peer review only

## 1 RESULTS

2 The total study population was 16,460. Of those, 11,276 were successfully followed up and  
3 11,229 responded to the back/neck pain questions, which gives a follow-up rate of 68%,  
4 (figure 1).

5 Of the 16,460 participants, 1,989 (12%) reported poor work ability and 1,392 (8%) reported  
6 mild or severe sleep disturbances at baseline. A detailed description of the study population is  
7 displayed in table 2 and stratified into those with poor versus good work ability. Age and sex  
8 were relatively evenly distributed across the two groups. The most common occupations  
9 represented were intermediate non-manual workers and employed/self-employed  
10 professionals/higher civil servants/executives.

1

2 Table 2. Baseline characteristics of the study population in relation to work ability

3 (n=16,460)

| Characteristic                                        | Good work ability |       | Poor <sup>1</sup> work ability |       |
|-------------------------------------------------------|-------------------|-------|--------------------------------|-------|
|                                                       | n: 14,471 (88%)   |       | n: 1,989 (12%)                 |       |
|                                                       | n                 | %     | n                              | %     |
| Female                                                | 8,279             | 57    | 1,252                          | 63    |
| Age Mean (SD)                                         | 43.2              | 10.0  | 42.9                           | 10.5  |
| Age Median (min-max)                                  | 44                | 18–60 | 44                             | 18–60 |
| Socioeconomic Status                                  |                   |       |                                |       |
| Unskilled/semiskilled workers                         | 1,498             | 11    | 406                            | 22    |
| Skilled workers                                       | 1,401             | 10    | 248                            | 13    |
| Assistant non-manual workers                          | 1,932             | 14    | 244                            | 13    |
| Intermediate non-manual workers                       | 4,164             | 30    | 468                            | 25    |
| Employed/self-employed professionals,                 | 3,501             | 25    | 333                            | 18    |
| Self-employed other than professionals                | 1,283             | 9     | 169                            | 9     |
| Household composition                                 |                   |       |                                |       |
| Living together with adult (with or without children) | 11,628            | 81    | 1,464                          | 74    |
| Living with children                                  | 805               | 5     | 147                            | 7     |
| Living alone                                          | 1,990             | 14    | 369                            | 19    |
| Body Mass Index, kg/m <sup>2</sup>                    |                   |       |                                |       |
| < 18.5                                                | 187               | 1     | 39                             | 2     |
| 18.5–24.9                                             | 7,978             | 56    | 1,022                          | 53    |
| 25.0–29.9                                             | 4,628             | 33    | 600                            | 31    |

|                                              |        |        |    |       |    |
|----------------------------------------------|--------|--------|----|-------|----|
|                                              | ≥ 30.0 | 1,446  | 10 | 281   | 15 |
| Daily Smoking                                |        | 1,424  | 10 | 320   | 16 |
| Physical Activity <sup>2</sup>               |        |        |    |       |    |
| None or low (less than 1 hr/w)               |        | 1,989  | 14 | 445   | 23 |
| Intermediate                                 |        | 8,730  | 60 | 1,149 | 58 |
| High                                         |        | 3,288  | 23 | 336   | 17 |
| Very High (more than 5 hrs /w)               |        | 424    | 3  | 47    | 2  |
| Sedentary leisure time (TV, reading etc.)    |        |        |    |       |    |
| < 2 hrs/day                                  |        | 9,111  | 63 | 1,038 | 53 |
| 2–3 hrs/day                                  |        | 3,740  | 26 | 578   | 29 |
| More than 3 hrs/day                          |        | 1,558  | 11 | 360   | 18 |
| Sleep disturbances                           |        |        |    |       |    |
| No                                           |        | 10,478 | 73 | 914   | 47 |
| Yes, mild                                    |        | 355    | 25 | 866   | 44 |
| Yes, severe                                  |        | 237    | 2  | 169   | 9  |
| Psychological Distress (GHQ12 <sup>3</sup> ) |        |        |    |       |    |
| No (0-2)                                     |        | 12,250 | 85 | 1,005 | 51 |
| Mild (3-6)                                   |        | 1,590  | 11 | 485   | 25 |
| Severe (7-12)                                |        | 602    | 4  | 493   | 25 |
| Long-standing illness                        |        | 8,200  | 22 | 3,837 | 54 |

<sup>1</sup> WAI (Work Ability Index) items[11], self-perceived physical and/or mental work ability in relation to job demands and defined as moderate, rather poor, poor. <sup>2</sup> Defined as a combination of cycling/walking and other physical activity expressed as hours per week

1  
2  
3  
4  
5  
6  
7  
8  
9  
10  
11  
12  
13  
14  
15  
16  
17  
18  
19  
20  
21  
22  
23  
24  
25  
26  
27  
28  
29  
30  
31  
32  
33  
34  
35  
36  
37  
38  
39  
40  
41  
42  
43  
44  
45  
46  
47  
48  
49  
50  
51  
52  
53  
54  
55  
56  
57  
58  
59  
60

1    <sup>3</sup> GHQ12 General Health Questionnaire – 12 items[27].Total numbers across rows differ due  
2    to internal missing values  
3

For peer review only

1

2 In 2014, 1,056 (9%) of the 11,229 responders had developed LNBP. Those successfully  
3 followed-up were compared with those who dropped out/had missing information on the  
4 outcome (n=5,231), with respect to the main exposure work ability. Fifteen percent of the  
5 dropouts had poor work ability compared to 11% among those successfully followed-up.

6 The results of the Poisson log linear regression analyses are presented in tables 3 and 4. Of  
7 those with poor work ability, 214 (18%) participants developed LNBP. The confounders in  
8 this association were socioeconomic status (SES) and long-standing illness and were  
9 therefore adjusted for, yielding an RR of 1.8 (95% CI;1.6–2.2). Adding sleep disturbances to  
10 the model yields an RR of 1.7 (95% CI; 1.4–2.0) (table 3 a).

11 Of those with sleep disturbances, 411 (13%) developed LNBP. Socioeconomic status (SES)  
12 and long-standing illness were confounders also in the association between sleep disturbances  
13 and the outcome (adjusted RR 1.5 (95%CI; 1.3–1.7)). Adding poor work ability to the model  
14 yields an RR of 1.4 (95%CI:1.2–1.6) (table 3b).

15

Table 3. Association between poor work ability<sup>1</sup> (a) and sleep disturbances<sup>2</sup> (b) and long-duration activity limiting neck -and/or back pain. Risk Ratio (RR) and 95% Confidence Interval (95%CI)

| (a)                             | Cases/     | Crude RR | 95 % CI   | Model 1 <sup>3</sup> Adjusted RR | 95% CI    | Model 2 <sup>4</sup> Adjusted RR | 95% CI    |
|---------------------------------|------------|----------|-----------|----------------------------------|-----------|----------------------------------|-----------|
|                                 | All        |          |           |                                  |           |                                  |           |
| Good work ability               | 842/10,011 | ref      |           | ref                              |           | ref                              |           |
| Poor work ability <sup>1</sup>  | 214/1,218  | 2.1      | (1.8-2.4) | 1.8                              | (1.6-2.1) | 1.7                              | (1.4-2.0) |
| (b)                             | Cases/     | Crude RR | 95 % CI   | Model 1 <sup>3</sup> Adjusted RR | 95% CI    | Model 2 <sup>5</sup> Adjusted RR | 95% CI    |
|                                 | All        |          |           |                                  |           |                                  |           |
| Good sleep                      | 625/7,833  | ref      |           | ref                              |           | ref                              |           |
| Sleep disturbances <sup>2</sup> | 411/3,257  | 1.6      | (1.4-1.8) | 1.5                              | (1.3-1.7) | 1.4                              | (1.2-1.5) |



1  
2  
3 <sup>1</sup> WAI (Work Ability Index) items, self-perceived physical and/or mental work ability in relation to job demands and defined as moderate, rather  
4 poor, poor. <sup>2</sup> Sleep disturbances = current mild or severe sleep disturbances. <sup>3</sup> Adjusted for socioeconomic status, chronic comorbidity  
5 and subsample (year 2002, 2006, 2010). <sup>4</sup> Adjusted for socioeconomic status, chronic comorbidity, sleep disturbances and subsample  
6 (year 2002, 2006, 2010). <sup>5</sup> Adjusted for socioeconomic status, chronic comorbidity, work ability and subsample (year 2002, 2006, 2010)  
7  
8  
9  
10  
11  
12  
13  
14  
15  
16  
17  
18  
19  
20  
21  
22  
23  
24  
25  
26  
27  
28  
29  
30  
31  
32  
33  
34  
35  
36  
37  
38  
39  
40  
41  
42  
43  
44  
45  
46

For peer review only

1  
2  
3 1  
4  
5 2 The analysis including the interaction variable, poor work ability and sleep disturbances,  
6  
7 3 showed after adjusting for SES and chronic comorbidity that those solely with poor WAI had  
8  
9  
10 4 a doubly increased risk of developing LNBP (RR 2.1 (95% CI; 1.7–2.6) compared to those  
11  
12 5 with none of the risk factors. Having sleep disturbances solely yields an RR 1.5 (95% CI;  
13  
14 6 1.3–1.7) and having both conditions was similar to having poor WAI only (RR 2.1  
15  
16 7 (95%CI;1.7–2.6) (table 4).  
17  
18  
19  
20 8  
21  
22  
23  
24  
25  
26  
27  
28  
29  
30  
31  
32  
33  
34  
35  
36  
37  
38  
39  
40  
41  
42  
43  
44  
45  
46  
47  
48  
49  
50  
51  
52  
53  
54  
55  
56  
57  
58  
59  
60

For peer review only

Table 4. Association between different combinations of poor work ability<sup>1</sup> and sleep disturbances<sup>2</sup>, and long-duration activity limiting neck - and/or back pain.

Risk Ratio (RR) and 95% Confidence Interval (95%CI)

|                                           | Cases/ All | Crude RR | 95 % CI   | Adjusted <sup>3</sup> RR | 95% CI    |
|-------------------------------------------|------------|----------|-----------|--------------------------|-----------|
| Good work ability/ No sleep disturbances  | 534/7,281  | ref      |           | ref                      |           |
| Poor work ability / No sleep disturbances | 91/552     | 2.4      | (2.0-3.0) | 2.1                      | (1.7-2.6) |
| Good work ability /Sleep disturbances     | 294/2,610  | 1.5      | (1.3-1.8) | 1.5                      | (1.3-1.7) |
| Poor work ability /Sleep disturbances     | 117/647    | 2.4      | (1.9-2.9) | 2.1                      | (1.6-2.6) |

<sup>1</sup> Assessed with WAI (Work Ability Index) items, self-perceived physical and/or mental work ability in relation to job demands and defined as moderate, rather poor, poor. <sup>2</sup> Sleep disturbances = current mild or severe sleep disturbances. <sup>3</sup> Adjusted for socioeconomic status, long-standing illness and subsample (year 2002, 2006, 2010)

1  
2  
3 1  
4  
5 2 **DISCUSSION**  
6

7 3 The results of this study suggest that persons with occasional NBP who assess their work  
8  
9 4 ability (mental and/or physical) as poor, in relation to the work demands, have a higher risk  
10  
11 5 of developing LNBP. Also, those who reported sleep disturbances have a higher risk of such  
12  
13 6 an outcome. The risk in persons with both poor work ability and sleep disturbances was not  
14  
15 7 more than additive.  
16  
17

18  
19 8 When it comes to research about work ability and NBP, we only found one earlier study,  
20  
21 9 namely on primary care patients with various durations of low back pain. In that prognostic  
22  
23 10 study, they used another item from the WAI when predicting decrease in disability[14], thus  
24  
25 11 it is not comparable to our risk study.  
26  
27

28  
29 12 The majority of published studies using items from the WAI, when measuring work ability  
30  
31 13 and its impact on health, have sickness absence as the outcome[7, 8, 30, 31]. In the present  
32  
33 14 study, we note that only 1/3 of the cases had a history of sickness absence in the year prior to  
34  
35 15 the follow up, thus our study adds new knowledge to this topic, since the outcome in our  
36  
37 16 study is not equal or similar to sickness absenteeism or disability pension investigated in  
38  
39 17 previous studies.  
40  
41

42  
43 18 Perceived physical and/or mental work ability in relation to work demands are theoretically  
44  
45 19 modifiable factors, although they are not always easy to change without changing job or  
46  
47 20 employer. Poor work ability has been shown to be associated with high work turnover[10],  
48  
49 21 thus job change may be an option in order to prevent long-duration activity limiting pain  
50  
51 22 conditions. Another option might be that the employee in dialogue with their employer  
52  
53 23 investigates the possibilities of changes within the current job, or that the individual takes  
54  
55 24 their own responsibility for physical and mental health maintenances through self-care such  
56  
57 25 as leisure time physical activity or similar actions.  
58  
59  
60

1  
2  
3 1 Several studies have shown that sleep disturbance or daytime sleepiness are risk factors for  
4  
5 2 the onset of NBP as well as a factor that impedes recovery[32-34], and are also a risk factor  
6  
7 3 for the onset of musculoskeletal pain in general[35, 36]. One likely mechanism behind the  
8  
9 4 association between sleep disturbances and pain is elevated levels of inflammatory markers  
10  
11 5 triggering the onset of, and continuation of pain[37]. We have, however, not found any  
12  
13 6 previous studies based on a population with occasional NBP. Sleep disturbance is a  
14  
15 7 modifiable factor, and cognitive behaviour therapy is a recommended treatment for insomnia,  
16  
17 8 the most common sleep disturbance[38]. There is also some evidence that cognitive therapy  
18  
19 9 for insomnia may improve other health problems such as depression and anxiety; thus,  
20  
21 10 treating sleep problems may also improve comorbid conditions that in turn are often related  
22  
23 11 to pain [39]. It is, therefore, possible that treating sleep problems in persons with occasional  
24  
25 12 NBP may reduce the risk of activity limiting pain, but this needs to be evaluated in future  
26  
27 13 studies.  
28  
29  
30  
31  
32  
33

#### 34 **Strengths**

35  
36  
37 15 This is a population-based longitudinal study covering residents in the largest county in  
38  
39 16 Sweden with a large sample size allowing interaction analysis. Another strength is the  
40  
41 17 thorough control for possible confounding factors in the analyses. Furthermore,  
42  
43  
44 18 although almost 1/3 of the study participants had dropped out at the follow up in 2014, the  
45  
46 19 prevalence of the main exposure was 11% and 15% of these successfully followed versus the  
47  
48 20 dropouts. We believe that selection bias has a minor impact on the results, although this  
49  
50 21 cannot be fully ruled out. If the exposed participants who dropped out were less likely to have  
51  
52 22 the outcome compared to the exposed participants who were successfully followed, we may  
53  
54 23 have overestimated the true effect. We excluded those who in 2010 reported that they had a  
55  
56 24 sickness absence of more than 90 days during the 12 months preceding entry to the study.  
57  
58  
59  
60

1  
2  
3 1 The reason for this was to avoid the issue of major morbidity influencing the participants'  
4  
5 2 judgment of their work ability for illness not related to NBP, and thus also reducing the risk  
6  
7  
8 3 of null findings when there would be a true risk.  
9

#### 10 4 **Limitations**

11  
12  
13  
14 5 The main limitations are possible misclassification due to imprecise or time-varying  
15  
16 6 exposure, resulting in a non-differential exposure misclassification which, if any, will have  
17  
18 7 led to a dilution of the effect estimate. In particular, we believe that the way sleep  
19  
20 8 disturbances were measured may be prone to misclassification. One single question with  
21  
22 9 three response alternatives may not fully capture the concept of sleep disturbances.  
23  
24  
25  
26 10 Also, work ability may be prone to non-differential misclassification, since we did not have  
27  
28 11 access to the full WAI. However, these single questions on perceived work ability in relation  
29  
30 12 to job demands have previously been validated, both against the full WAI[13] and when used  
31  
32 13 as predictors for sickness absences with acceptable results[12]. Nevertheless, if anything,  
33  
34 14 such misclassification bias would lead to diluted associations. Furthermore, the exposure  
35  
36 15 work ability may change over the follow-up period, most likely due to a job change. Exactly  
37  
38 16 the same proportion among cases and non-cases had changed job/new employer in 2014  
39  
40 17 compared to 2010, (28%), which to some extent reduces the likelihood of differential  
41  
42 18 misclassification of work ability.  
43  
44  
45  
46

47 19 There is also a risk of residual confounding due to unprecise measure of confounding factors,  
48  
49 20 such as physical activity, sedentary leisure time activities and smoking, as well as  
50  
51 21 unmeasured confounding. Such bias may have led to under or overestimation of the results.  
52  
53 22 During a four-year follow-up, time varying prognostic factors, among others treatment for  
54  
55 23 NBP, may have had an impact on the risk of developing LNBP. Since these are present  
56  
57  
58  
59  
60

1 among exposed as well as un-exposed, the most likely effect of such factors would be a  
2 dilution of the associations reported.

3 We claim that the results of our study are generalizable to other settings on persons active in  
4 working life. Even though the study showed that the absolute risk of LNBP is modest, with  
5 less than 10% of those with occasional NBP developing the more severe condition according  
6 to our definition, it is a major and expensive public health problem that accumulates over  
7 time.

8 This study adds knowledge to the area of why persons with occasional NBP develop long-  
9 duration and activity limiting NBP. Paying attention to persons with occasional NBP who  
10 have poor perceived work ability and/or sleep disturbances, and taking action accordingly,  
11 may reduce this burden of ill-health. We welcome future research on the effect of  
12 occupational preventive measures for workers with poor work ability.

### 13 **ACKNOWLEDGEMENTS**

14 We thank Peeter Fredlund, Research Statistician at Karolinska Institutet and SLL Centre for  
15 Epidemiology and Community Medicine, Stockholm, for providing us with the data and for  
16 the prompt answers to our questions about the variables.

### 17 **AUTHOR CONTRIBUTIONS**

18 LWH, TB, ML and ES contributed to the conceptualisation and methodology of the study  
19 which was approved by CM. CM provided the data resources. LWH made the statistical  
20 analyses based on a protocol approved by the co-authors. LWH wrote a draft of the  
21 manuscript. All authors contributed to the interpretation of the results and critically revised  
22 the manuscript and finally approved the last version.

### 23 **FUNDING**

1  
2  
3 1 The study was funded by AFA- Insurance Grant No 170095. The funder had no involvement  
4  
5 2 in any of the steps of the manuscript preparation.  
6  
7

### 8 3 **COMPETING INTERESTS**

9  
10  
11 4 Dr:s Eva Skillgate and Lena Holm are scientific consultants at the Scandinavian College of  
12  
13 5 Naprapathic Manual Medicine and members of their Scientific Board.  
14  
15

### 16 6 **ETHICS APPROVAL**

17  
18  
19 7 Ethical approval was obtained from the regional ethical review board in Stockholm (Dnr;  
20  
21 8 2007/545-31, 2013/497-32 and 2015/1204-32). The questionnaires included information  
22  
23 9 about handling of personal data, and the participants accepted the use of their data by  
24  
25 10 answering to the questionnaires (written informed consent).  
26  
27  
28

### 29 11 **DATA SHARING STATEMENT**

30  
31  
32 12 Due to ethical restrictions and laws (GDPR) of disclosing personal data, authors have to seek  
33  
34 13 permission to allow us to make the data used in this study available. Data will be available  
35  
36 14 upon request after permission is granted from the Karolinska Institutet's Ethics Review Board  
37  
38 15 in Stockholm. Inquiries for data access should first be sent to [eva.skillgate@ki.se](mailto:eva.skillgate@ki.se), who will  
39  
40 16 then contact the ethics board for permission to openly share the data.  
41  
42  
43  
44  
45  
46  
47  
48  
49  
50  
51  
52  
53  
54  
55  
56  
57  
58  
59  
60



## REFERENCES

1. Hoy D, Bain C, Williams G, et al. A systematic review of the global prevalence of low back pain. *Arthritis Rheum.* 2012;64(6):2028-37. Epub 2012/01/11. doi: 10.1002/art.34347.
2. Hoy D, March L, Woolf A, et al. The global burden of neck pain: estimates from the global burden of disease 2010 study. *Ann Rheum Dis.* 2014;73(7):1309-15. doi: 10.1136/annrheumdis-2013-204431.
3. Kim R, Wiest C, Clark K, Cook C, et al. Identifying risk factors for first-episode neck pain: A systematic review. *Musculoskelet Sci Pract.* 2018;33:77-83. doi: 10.1016/j.msksp.2017.11.007.
4. Shiri R, Falah-Hassani K. Does leisure time physical activity protect against low back pain? Systematic review and meta-analysis of 36 prospective cohort studies. *Br J Sports Med.* 2017;51(19):1410-8. doi: 10.1136/bjsports-2016-097352.
5. da Silva T, Mills K, Brown BT, et al. Risk of Recurrence of Low Back Pain: A Systematic Review. *J Orthop Sports Phys Ther.* 2017;47(5):305-13. doi: 10.2519/jospt.2017.7415.
6. Langenfeld A, Humphreys BK, Swanenburg J, et al. Prognostic factors for recurrences in neck pain patients up to 1 year after chiropractic care. *J Manipulative Physiol Ther.* 2015;38(7):458-64. doi: 10.1016/j.jmpt.2015.06.014.
7. Alavinia SM, de Boer AG, van Duivenbooden JC, et al. Determinants of work ability and its predictive value for disability. *Occup Med (Lond).* 2009;59(1):32-7. Epub 2008/12/17. doi: 10.1093/occmed/kqn148 kqn148[pii].
8. Kinnunen U, Natti J. Work ability score and future work ability as predictors of register-based disability pension and long-term sickness absence: A three-year follow-up study. *Scand J Public Health.* 2018;46(3):321-30. doi: 10.1177/1403494817745190.
9. Lohela Karlsson M, Busch H, Aboagye E, Jensen I. Validation of a measure of health-related production loss: construct validity and responsiveness - a cohort study. *BMC Public Health.* 2015;15:1148. Epub 2015/11/21. doi: 10.1186/s12889-015-2449-z 10.1186/s12889-015-2449-z [pii].

- 1  
2  
3 1 10. Rongen A, Robroek SJ, van der Heijden BI, et al. Influence of work-related characteristics and  
4  
5 2 work ability on changing employer or leaving the profession among nursing staff. *J Nurs Manag.*  
6  
7 3 2014;22(8):1065-75. Epub 2013/08/15. doi: 10.1111/jonm.12066.  
8  
9 4 11. Tuomi K, Ilmarinen J, Jahkola A, et al. Work ability index. Helsinki: Finnish Institute of  
10  
11 5 Occupational Health, 1998.  
12  
13 6 12. Ahlstrom L, Grimby-Ekman A, Hagberg M, et al. The work ability index and single-item  
14  
15 7 question: associations with sick leave, symptoms, and health--a prospective study of women on long-  
16  
17 8 term sick leave. *Scand J Work Environ Health.* 2010;36(5):404-12. Epub 2010/04/08.  
18  
19 9 13. Lundin A, Leijon O, Vaez M, et al. Predictive validity of the Work Ability Index and its  
20  
21 10 individual items in the general population. *Scand J Public Health.* 2017;45(4):350-6. Epub  
22  
23 11 2017/04/08. doi: 10.1177/1403494817702759.  
24  
25 12 14. Nordstoga AL, Vasseljen O, Meisingset I, et al. Improvement in Work Ability, Psychological  
26  
27 13 Distress and Pain Sites in Relation to Low Back Pain Prognosis: A Longitudinal Observational Study  
28  
29 14 in Primary Care. *Spine (Phila Pa 1976).* 2019;44(7):E423-E9. doi: 10.1097/BRS.0000000000002860.  
30  
31 15 15. Parthasarathy S, Vasquez MM, Halonen M, et al. Persistent insomnia is associated with mortality  
32  
33 16 risk. *Am J Med.* 2015;128(3):268-75 e2. doi: 10.1016/j.amjmed.2014.10.015.  
34  
35 17 16. Nieters A, Blagitko-Dorfs N, Peter HH, et al. Psychophysiological insomnia and respiratory tract  
36  
37 18 infections: results of an infection-diary-based cohort study. *Sleep.* 2019. doi: 10.1093/sleep/zsz098.  
38  
39 19 17. Dong Y, Yang FM. Insomnia symptoms predict both future hypertension and depression. *Prev*  
40  
41 20 *Med.* 2019;123:41-7. doi: 10.1016/j.ypmed.2019.02.001. PubMed PMID: 30742871.  
42  
43 21 18. Canivet C, Ostergren PO, Choi B, et al. Sleeping problems as a risk factor for subsequent  
44  
45 22 musculoskeletal pain and the role of job strain: results from a one-year follow-up of the Malmo  
46  
47 23 Shoulder Neck Study Cohort. *Int J Behav Med.* 2008;15(4):254-62. doi:  
48  
49 24 10.1080/10705500802365466.  
50  
51 25 19. Kovacs FM, Seco J, Royuela A, et al. Patients with neck pain are less likely to improve if they  
52  
53 26 experience poor sleep quality: a prospective study in routine practice. *Clin J Pain.* 2015;31(8):713-21.  
54  
55 27 doi: 10.1097/AJP.000000000000147.  
56  
57  
58  
59  
60

- 1  
2  
3 1 20. Paanalahti K, Wertli MM, Held U, et al. Spinal pain--good sleep matters: a secondary analysis of  
4  
5 2 a randomized controlled trial. *Eur Spine J*. 2016;25(3):760-5. doi: 10.1007/s00586-015-3987-x.  
6  
7 3 21. Aili K, Nyman T, Hillert L, et al. Sleep disturbances predict future sickness absence among  
8  
9 4 individuals with lower back or neck-shoulder pain: a 5-year prospective study. *Scand J Public Health*.  
10  
11 5 2015;43(3):315-23. doi: 10.1177/1403494814567755.  
12  
13 6 22. Rasmussen-Barr E, Grooten WJ, Hallqvist J, et al. Are job strain and sleep disturbances prognostic  
14  
15 7 factors for neck/shoulder/arm pain? A cohort study of a general population of working age in Sweden.  
16  
17 8 *BMJ Open*. 2014;4(7):e005103. doi: 10.1136/bmjopen-2014-005103.  
18  
19 9 23. Rasmussen-Barr E, Grooten WJA, Hallqvist J, et al. Are job strain and sleep disturbances  
20  
21 10 prognostic factors for low-back pain? A cohort study of a general population of working age in  
22  
23 11 Sweden. *J Rehabil Med*. 2017;49(7):591-7. doi: 10.2340/16501977-2249.  
24  
25 12 24. Palmlof L, Holm LW, Alfredsson L, et al. The impact of work related physical activity and leisure  
26  
27 13 physical activity on the risk and prognosis of neck pain - a population based cohort study on workers.  
28  
29 14 *BMC Musculoskelet Disord*. 2016;17:219. doi: 10.1186/s12891-016-1080-1.  
30  
31 15 25. de Zwart BC, Frings-Dresen MH, van Duivenbooden JC. Test-retest reliability of the Work  
32  
33 16 Ability Index questionnaire. *Occup Med (Lond)*. 2002;52(4):177-81. Epub 2002/07/02.  
34  
35 17 26. Radkiewich P W-BM, editor Psychometric Properties of Work Ability Index in the Light of  
36  
37 18 Comparative Survey Study. 2nd International Symposium on Work Ability; 2004; Verona, Italy:  
38  
39 19 Elsevier; 2005.  
40  
41 20 27. Goldberg DP, Gater R, Sartorius N, et al. The validity of two versions of the GHQ in the WHO  
42  
43 21 study of mental illness in general health care. *Psychol Med*. 1997;27(1):191-7.  
44  
45 22 28. Lundin A, Hallgren M, Theobald H, et al. Validity of the 12-item version of the General Health  
46  
47 23 Questionnaire in detecting depression in the general population. *Public Health*. 2016;136:66-74. doi:  
48  
49 24 10.1016/j.puhe.2016.03.005.  
50  
51 25 29. Andersson T, Alfredsson L, Kallberg H, et al. Calculating measures of biological interaction. *Eur*  
52  
53 26 *J Epidemiol*. 2005;20(7):575-9.  
54  
55  
56  
57  
58  
59  
60

- 1  
2  
3 1 30. Alavinia SM, van den Berg TI, van Duivenbooden C, et al. Impact of work-related factors,  
4  
5 2 lifestyle, and work ability on sickness absence among Dutch construction workers. *Scand J Work*  
6  
7 3 *Environ Health*. 2009;35(5):325-33.  
8  
9 4 31. Jaaskelainen A, Kausto J, Seitsamo J, et al. Work ability index and perceived work ability as  
10  
11 5 predictors of disability pension: a prospective study among Finnish municipal employees. *Scand J*  
12  
13 6 *Work Environ Health*. 2016. Epub 2016/10/06. doi: 10.5271/sjweh.3598 3598 [pii].  
14  
15  
16 7 32. Yabe Y, Hagiwara Y, Sekiguchi T, et al. Sleep Disturbance Is Associated with New Onset and  
17  
18 8 Continuation of Lower Back Pain: A Longitudinal Study among Survivors of the Great East Japan  
19  
20 9 Earthquake. *Tohoku J Exp Med*. 2018;246(1):9-14. doi: 10.1620/tjem.246.9.  
21  
22  
23 10 33. Gustafsson ML, Laaksonen C, Aromaa M, et al. The prevalence of neck-shoulder pain, back pain  
24  
25 11 and psychological symptoms in association with daytime sleepiness - a prospective follow-up study of  
26  
27 12 school children aged 10 to 15. *Scand J Pain*. 2018;18(3):389-97. doi: 10.1515/sjpain-2017-0166.  
28  
29 13 34. Sawada T, Matsudaira K, Muto Y, et al. Potential risk factors for onset of severe neck and  
30  
31 14 shoulder discomfort (Katakori) in urban Japanese workers. *Ind Health*. 2016;54(3):230-6. doi:  
32  
33 15 10.2486/indhealth.2015-0143.  
34  
35 16 35. Nitter AK, Pripp AH, Forseth KO. Are sleep problems and non-specific health complaints risk  
36  
37 17 factors for chronic pain? A prospective population-based study with 17 year follow-up. *Scand J Pain*.  
38  
39 18 2012;3(4):210-7. doi: 10.1016/j.sjpain.2012.04.001.  
40  
41  
42 19 36. Generaal E, Vogelzangs N, Penninx BW, et al. Insomnia, Sleep Duration, Depressive Symptoms,  
43  
44 20 and the Onset of Chronic Multisite Musculoskeletal Pain. *Sleep*. 2017;40(1). doi:  
45  
46 21 10.1093/sleep/zsw030.  
47  
48 22 37. Haack M, Sanchez E, Mullington JM. Elevated inflammatory markers in response to prolonged  
49  
50 23 sleep restriction are associated with increased pain experience in healthy volunteers. *Sleep*.  
51  
52 24 2007;30(9):1145-52.  
53  
54 25 38. Koffel EA, Koffel JB, Gehrman PR. A meta-analysis of group cognitive behavioral therapy for  
55  
56 26 insomnia. *Sleep Med Rev*. 2015;19:6-16. doi: 10.1016/j.smr.2014.05.001.  
57  
58  
59  
60

- 1  
2  
3 1 39. Ye YY, Zhang YF, Chen J, et al. Internet-Based Cognitive Behavioral Therapy for Insomnia  
4  
5 2 (ICBT-i) Improves Comorbid Anxiety and Depression-A Meta-Analysis of Randomized Controlled  
6  
7 3 Trials. *PLoS One*. 2015;10(11):e0142258. doi: 10.1371/journal.pone.0142258.  
8  
9  
10  
11  
12  
13  
14  
15  
16  
17  
18  
19  
20  
21  
22  
23  
24  
25  
26  
27  
28  
29  
30  
31  
32  
33  
34  
35  
36  
37  
38  
39  
40  
41  
42  
43  
44  
45  
46  
47  
48  
49  
50  
51  
52  
53  
54  
55  
56  
57  
58  
59  
60

For peer review only

Figure 1. Flowchart of the inclusion of the study population and follow up.

\* NBP; neck and/or back pain.

For peer review only

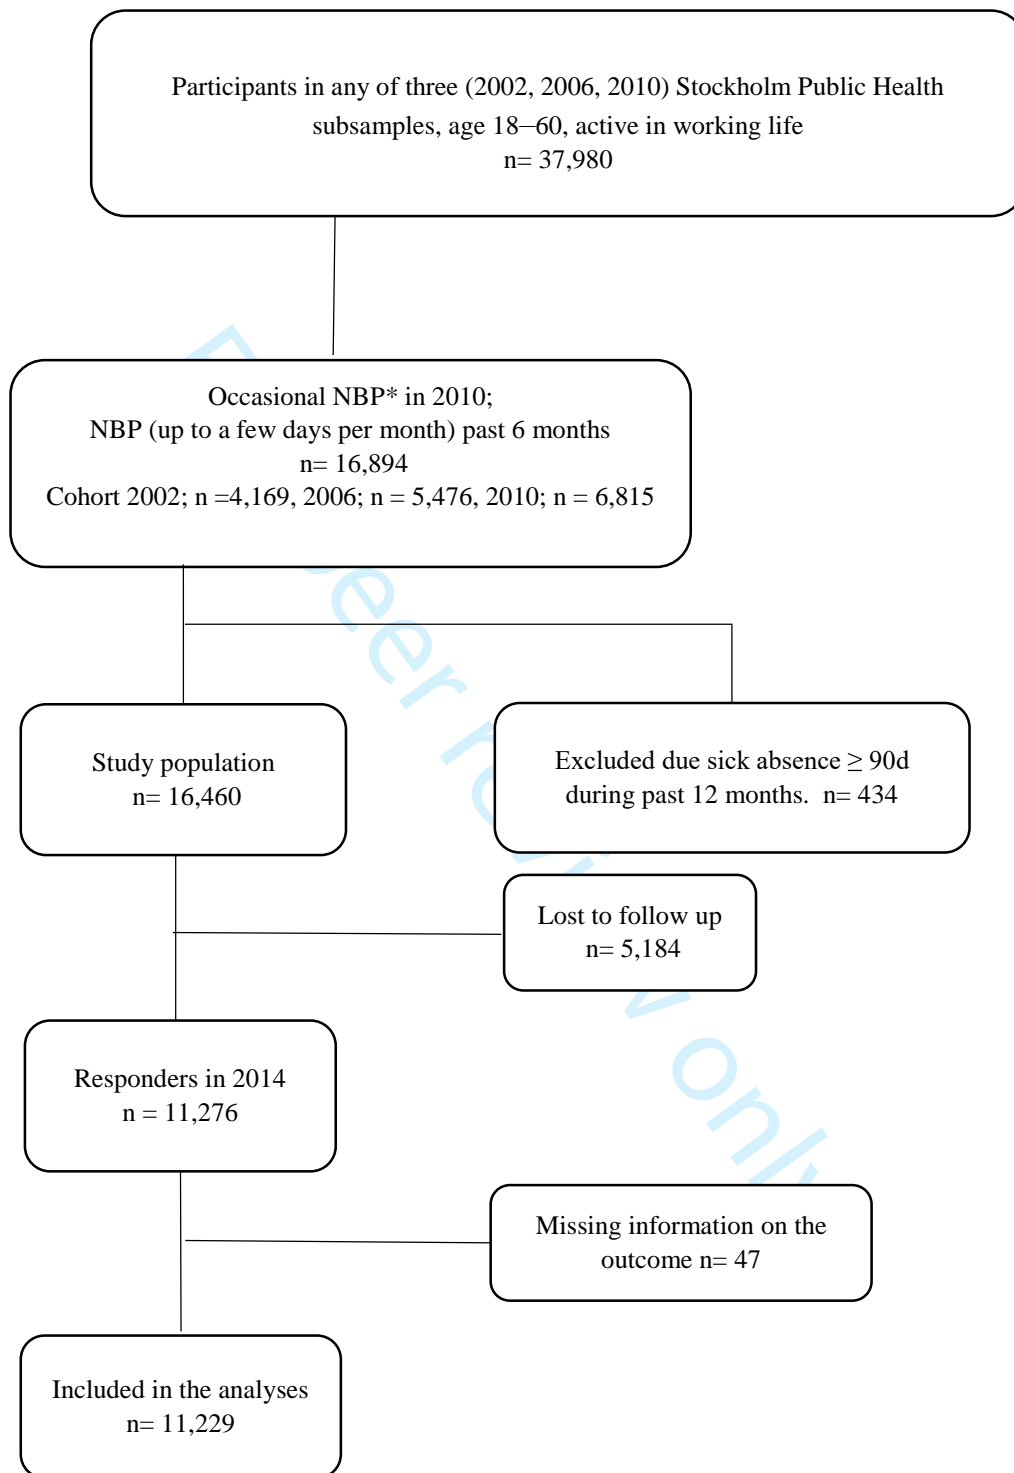

STROBE Statement—Checklist of items that should be included in reports of *cohort studies*

|                              | Item No | Recommendation                                                                                                                                                                       | Considered                                                              |
|------------------------------|---------|--------------------------------------------------------------------------------------------------------------------------------------------------------------------------------------|-------------------------------------------------------------------------|
| Title and abstract           | 1       | (a) Indicate the study's design with a commonly used term in the title or the abstract                                                                                               | yes                                                                     |
|                              |         | (b) Provide in the abstract an informative and balanced summary of what was done and what was found                                                                                  | yes                                                                     |
| <b>Introduction</b>          |         |                                                                                                                                                                                      |                                                                         |
| Background/rationale         | 2       | Explain the scientific background and rationale for the investigation being reported                                                                                                 | Yes pp 5; lines 3 – 8, 14-18<br>Pp 7 lines 3-6                          |
| Objectives                   | 3       | State specific objectives, including any prespecified hypotheses                                                                                                                     | Yes pp 7 lines 6-9                                                      |
| <b>Methods</b>               |         |                                                                                                                                                                                      |                                                                         |
| Study design                 | 4       | Present key elements of study design early in the paper                                                                                                                              | Yes pp 8<br>Lines 3-4                                                   |
| Setting                      | 5       | Describe the setting, locations, and relevant dates, including periods of recruitment, exposure, follow-up, and data collection                                                      | Yes<br>Pp 8 , lines 3-24, pp9 lines 1-13                                |
| Participants                 | 6       | (a) Give the eligibility criteria, and the sources and methods of selection of participants. Describe methods of follow-up                                                           | Yes pp 8, lines 9-18<br>Pp 9 lines 15-17                                |
|                              |         | (b) For matched studies, give matching criteria and number of exposed and unexposed                                                                                                  | NA                                                                      |
| Variables                    | 7       | Clearly define all outcomes, exposures, predictors, potential confounders, and effect modifiers. Give diagnostic criteria, if applicable                                             | Yes<br>Pp 8 lines 19-24 pp -9, lines 1-22                               |
| Data sources/<br>measurement | 8*      | For each variable of interest, give sources of data and details of methods of assessment (measurement). Describe comparability of assessment methods if there is more than one group | Yes<br>Table 1 + pp 8-9                                                 |
| Bias                         | 9       | Describe any efforts to address potential sources of bias                                                                                                                            | Yes<br>Pp 25 Lines 7-23                                                 |
| Study size                   | 10      | Explain how the study size was arrived at                                                                                                                                            | Yes Figure 1                                                            |
| Quantitative variables       | 11      | Explain how quantitative variables were handled in the analyses. If applicable, describe which groupings were chosen and why                                                         | Yes<br>Table 1<br>Pp 8 Lines 20-24, pp 9, lines 1-13, pp 12- Lines 9-12 |
| Statistical methods          | 12      | (a) Describe all statistical methods, including those used to control for confounding                                                                                                | Yes pp 9, lines 18-22, pp 11, lines 3-24                                |
|                              |         | (b) Describe any methods used to examine subgroups and interactions                                                                                                                  | Yes pp 12<br>lines 9- 13                                                |
|                              |         | (c) Explain how missing data were addressed                                                                                                                                          | Yes table 2                                                             |



|                          |     |                                                                                                                                                                                                              |                                             |
|--------------------------|-----|--------------------------------------------------------------------------------------------------------------------------------------------------------------------------------------------------------------|---------------------------------------------|
|                          |     | (d) If applicable, explain how loss to follow-up was addressed                                                                                                                                               | Yes pp 12 .<br>lines 20-23                  |
|                          |     | (e) Describe any sensitivity analyses                                                                                                                                                                        | NA                                          |
| <b>Results</b>           |     |                                                                                                                                                                                                              |                                             |
| Participants             | 13* | (a) Report numbers of individuals at each stage of study—eg numbers potentially eligible, examined for eligibility, confirmed eligible, included in the study, completing follow-up, and analysed            | Yes Figure 1                                |
|                          |     | (b) Give reasons for non-participation at each stage                                                                                                                                                         | NA                                          |
|                          |     | (c) Consider use of a flow diagram                                                                                                                                                                           | Yes Figure 1                                |
| Descriptive data         | 14* | (a) Give characteristics of study participants (eg demographic, clinical, social) and information on exposures and potential confounders                                                                     | Yes Table 2<br>Table 1                      |
|                          |     | (b) Indicate number of participants with missing data for each variable of interest                                                                                                                          | Yes<br>Table 2                              |
|                          |     | (c) Summarise follow-up time (eg, average and total amount)                                                                                                                                                  | Yes 4 years<br>pp 8 lines 6-7               |
| Outcome data             | 15* | Report numbers of outcome events or summary measures over time                                                                                                                                               | Yes<br>Pp 15 line 2                         |
| Main results             | 16  | (a) Give unadjusted estimates and, if applicable, confounder-adjusted estimates and their precision (eg, 95% confidence interval). Make clear which confounders were adjusted for and why they were included | Yes<br>Pp 15 lines 6-14 -Tables 3 a and 3 b |
|                          |     | (b) Report category boundaries when continuous variables were categorized                                                                                                                                    | Yes<br>Table 1 and 2                        |
|                          |     | (c) If relevant, consider translating estimates of relative risk into absolute risk for a meaningful time period                                                                                             |                                             |
| Other analyses           | 17  | Report other analyses done—eg analyses of subgroups and interactions, and sensitivity analyses                                                                                                               | Yes tab4 4<br>and pp 21<br>lines 2-7        |
| <b>Discussion</b>        |     |                                                                                                                                                                                                              |                                             |
| Key results              | 18  | Summarise key results with reference to study objectives                                                                                                                                                     | Yes pp 23.<br>Lines 3-7                     |
| Limitations              | 19  | Discuss limitations of the study, taking into account sources of potential bias or imprecision. Discuss both direction and magnitude of any potential bias                                                   | Yes<br>Pp 25 lines 7-23                     |
| Interpretation           | 20  | Give a cautious overall interpretation of results considering objectives, limitations, multiplicity of analyses, results from similar studies, and other relevant evidence                                   | Yes pp 26<br>lines 6-10                     |
| Generalisability         | 21  | Discuss the generalisability (external validity) of the study results                                                                                                                                        | yes Yes pp 26<br>lines 1-5                  |
| <b>Other information</b> |     |                                                                                                                                                                                                              |                                             |
| Funding                  | 22  | Give the source of funding and the role of the funders for the present study and, if applicable, for the original study on which the present article is based                                                | Yes pp 25,<br>lines 22-23                   |

\*Give information separately for exposed and unexposed groups.

1 **Note:** An Explanation and Elaboration article discusses each checklist item and gives methodological background and  
2 published examples of transparent reporting. The STROBE checklist is best used in conjunction with this article (freely  
3 available on the Web sites of PLoS Medicine at <http://www.plosmedicine.org/>, Annals of Internal Medicine at  
4 <http://www.annals.org/>, and Epidemiology at <http://www.epidem.com/>). Information on the STROBE Initiative is  
5 available at <http://www.strobe-statement.org>.  
6  
7  
8  
9  
10  
11  
12  
13  
14  
15  
16  
17  
18  
19  
20  
21  
22  
23  
24  
25  
26  
27  
28  
29  
30  
31  
32  
33  
34  
35  
36  
37  
38  
39  
40  
41  
42  
43  
44  
45  
46  
47  
48  
49  
50  
51  
52  
53  
54  
55  
56  
57  
58  
59  
60

For peer review only
